# The olfactory gating of visual preferences to human skin and colors in mosquitoes

Diego Alonso San Alberto<sup>1,2</sup>, Claire Rusch<sup>1,2</sup>, Yinpeng Zhan<sup>3</sup>, Andrew D. Straw<sup>4</sup>, Craig  
Montell<sup>3</sup>, and Jeffrey A. Riffell<sup>1,†</sup>

<sup>1</sup>Department of Biology, University of Washington, Seattle, WA 98195, USA,

<sup>2</sup>Both authors contributed equally,

<sup>3</sup>University of California, Santa Barbara, Santa Barbara CA 93106, USA,

<sup>4</sup>Institute of Biology I & Bernstein Center Freiburg, Albert-Ludwigs-Universität Freiburg,  
Germany

**Keywords:** color vision, olfaction, sensory integration, mosquitoes, *Aedes aegypti*

---

\*Lead contact and to whom all correspondence should be addressed:

Jeffrey A. Riffell  
Department of Biology,  
University of Washington,  
Seattle, WA 98195, USA  
e-mail: [jriffell@uw.edu](mailto:jriffell@uw.edu)

## 1 **Abstract**

2 **Mosquitoes track odors, locate hosts, and find mates visually. The color of a food resource, such as**  
3 **a flower or warm-blooded host, can be dominated by long wavelengths of the visible light spectrum**  
4 **(green to red for humans) and is likely important for object recognition and localization. However,**  
5 **little is known about the hues that attract mosquitoes or how odor affects mosquito visual search**  
6 **behaviors. We used a real-time 3D tracking system and wind tunnel that allowed careful control of**  
7 **the olfactory and visual environment to quantify the behavior of more than 1.3 million mosquito**  
8 **trajectories. We found that CO<sub>2</sub> induces a strong attraction to specific hues, including those that**  
9 **humans perceive as cyan, orange, and red. Sensitivity to orange and red correlates with**  
10 **mosquitoes' strong attraction to the color spectrum of human skin, which is dominated by these**  
11 **wavelengths. Attraction was eliminated by filtering the orange and red bands from the skin color**  
12 **spectrum and by introducing mutations targeting specific long-wavelength opsins or CO<sub>2</sub> detection.**  
13 **Collectively, our results show that odor is critical for mosquitoes' wavelength preferences and that**  
14 **the mosquito visual system is a promising target for inhibiting their attraction to human hosts.**

15

## 16 **Introduction**

17 The behavioral preference of insects for certain bands in the visible light spectrum plays a profound role  
18 in structuring ecological communities by mediating processes such as plant-insect/predator-prey  
19 interactions and disease transmission<sup>1-3</sup>. For biting insects, such as mosquitoes, tsetse flies, and kissing  
20 bugs, vision plays an essential role in various behaviors, including flight control, object tracking for host-  
21 or nectar-finding, and locating oviposition sites<sup>4</sup>. The visual stimuli that mediate these behaviors are  
22 integrally tied to other host-related cues, such as scent and heat. For instance, when combined with an  
23 odor lure, tsetse flies are highly attracted to what humans perceive as blue color<sup>5,6</sup>, and kissing bugs prefer  
24 visual objects only when also associated with odors<sup>7</sup>. Visually guided mosquito behaviors are also  
25 thought to play a role in host attraction<sup>8-10</sup>. It has long been known that mosquitoes are attracted to dark,  
26 high-contrast objects<sup>9,11</sup>, which has led to the development of black traps<sup>10</sup>. For high-contrast visual  
27 stimuli, recent work has shown that certain odors stimulate visual search behaviors in *Aedes aegypti*  
28 mosquitoes. This species is not attracted to black objects in the absence of CO<sub>2</sub>, but after encountering a  
29 CO<sub>2</sub> plume, they become highly attracted to such objects<sup>11</sup>. Other cues (heat, water vapor, skin volatiles)  
30 mediate behaviors such as landing and biting<sup>11-14</sup>.

31 Despite the potential importance of color in mediating mosquito biting behaviors, surprisingly,  
32 details regarding other wavelengths that attract mosquitoes or how odors sensitize that attraction remain  
33 unclear. The visual spectra of important resources can be diverse and dominated by short and medium

34 wavelengths (e.g., flowers or oviposition sites) or long wavelengths (e.g., human skin) (Fig. 1a, b).  
35 Despite interest in developing traps and lures that exploit mosquito spectral preferences, only a few  
36 studies have examined these preferences, and the results of those studies have been contradictory. For  
37 instance, studies of *Ae. aegypti* have shown no difference in spectral preference in the 450–600 nm  
38 wavelength range<sup>15,16</sup>. By contrast, other studies have demonstrated specific preferences but for different  
39 wavelength bands: *Ae. aegypti* mosquitoes were attracted to blue in one study<sup>17</sup> and only to green-yellow  
40 in another<sup>18</sup>. Other studies have shown that mosquitoes sometimes prefer red<sup>15,19,20</sup>, although it is thought  
41 that mosquitoes lack opsin receptors sensitive to these wavelengths. Because mosquitoes are attracted to  
42 dark visual objects, responses to red may represent achromatic responses from visual channels that are  
43 sensitive to medium-wavelengths and therefore are perceived as dark grey or black when presented  
44 against a light-colored background. Nevertheless, these prior studies did not characterize the actual flight  
45 trajectories of the mosquitoes, nor control for the change in behavioral state associated with the smell of a  
46 host. Accurate control of both a visual object's reflectance and its contrast with the background is  
47 required to determine whether mosquitoes are attracted to specific wavelengths.

48 *Aedes aegypti* provides an excellent model for studies aimed at elucidating spectral preferences  
49 and determining how these preferences are modulated by odor. *Aedes aegypti*, which are active during the  
50 dawn and dusk periods<sup>21</sup>, have 10 rhodopsins, 5 of which are expressed in the adult eye<sup>22</sup>. Little is known  
51 about opsin tuning, although they are orthologs of medium-wavelength sensitive opsins (green), and  
52 previous electroretinogram (ERG) studies suggested that *Ae. aegypti* is sensitive to medium-long  
53 wavelengths in the green-yellow spectrum<sup>23,24</sup>. In this study, we used a large wind tunnel and  
54 computerized vision system to close these knowledge gaps regarding mosquito visual and olfactory  
55 responses by examining *Ae. aegypti* free-flight responses to objects of different wavelengths, with and  
56 without the presence of CO<sub>2</sub>. We show that when experiencing odor, mosquitoes become particularly  
57 attracted to hues that are dominant in human skin. We also demonstrate that knockout of either the  
58 olfactory channel that gates visual attraction or the opsins that allow detection of objects that reflect long  
59 wavelengths eliminates attraction to skin tones.

60

## 61 **Results**

### 62 *Olfactory gating of spectral preferences of Ae. aegypti mosquitoes*

63 Examining olfactory and visual search behaviors in mosquitoes often requires simulating conditions in  
64 which the statistics of the stimuli (e.g., intensity, duration) and resulting mosquito behavior are as natural  
65 as possible. We therefore examined *Ae. aegypti* behavior in a large wind tunnel spanning 450 mosquito  
66 body lengths and equipped with a 16-camera, real-time tracking system for monitoring and quantifying

67 mosquito behaviors<sup>11,25</sup>. A checkerboard pattern was projected on the bottom (floor) of the wind tunnel,  
68 and a low-contrast grey horizon was projected on each side of the tunnel to provide optic flow (Fig. 1c).  
69 Similar to our previous assays, we placed two identically sized circles (3-cm diameter) on the floor of the  
70 tunnel in the upwind area of the working section, 18 cm apart and 33 cm from the odor source (Fig. 1c).  
71 In each experimental trial, 50 mated *Ae. aegypti* females were released into the tunnel, and their  
72 trajectories were recorded over a 3-h period (1.3 million total trajectories were recorded, with an average  
73 trajectory duration of 3 s). The tunnel was filled with filtered air for 1 h, after which a CO<sub>2</sub> plume (95%  
74 filtered air, 5% CO<sub>2</sub>) located 33 cm away and separate from the visual objects was introduced into the  
75 tunnel and left for 1 h (Fig. 1d). Measurements of the plume showed an exponential decay, typical of  
76 turbulent diffusion, with a concentration of ~1500 ppm approximately 30 cm from the odor source. In the  
77 last hour of the experiment, only filtered air was released into the wind tunnel.

78 During exposure to filtered air, the mosquitoes exhibited random behavior to the odor source and  
79 visual objects, and they spent much of their time exploring the ceiling and walls of the tunnel and rarely  
80 investigated the visual objects (Fig. 1e). By contrast, upon exposure to the CO<sub>2</sub> plume, the number of  
81 flying mosquitoes more than doubled (Fig. 1f, h; Wilcoxon signed-rank test, number of trajectories in Air  
82 vs. CO<sub>2</sub>,  $P < 0.002$ ). During this time, the mosquitoes exhibited odor-tracking behavior, spending most of  
83 the time in the working section's central area with significantly elevated flight velocities (Figs. 1f, s1;  
84 Kruskal-Wallis test:  $df = 2$ , Chi-square = 597.23,  $P < 0.0001$ ). The CO<sub>2</sub> also triggered an attraction to the  
85 visual objects. The mosquitoes showed no interest in the objects during the filtered air treatment (only 1–  
86 4% of mosquitoes investigated), but during CO<sub>2</sub> release, the percentage and number of mosquitoes  
87 investigating the visual objects increased significantly (21%; paired Student's t-test:  $P = 0.002$ )  
88 (Supplementary Fig. S1). After the plume was stopped, the attraction to the visual objects ceased (Fig. 1e,  
89 Supplementary Fig. S1e; Wilcoxon signed-rank test, CO<sub>2</sub> vs. Post-CO<sub>2</sub>:  $P < 0.001$ ).

90 To ensure that mosquito visual preference behaviors were in response to discrete wavelength  
91 bands rather than object contrast, we employed visual stimuli in the range 430 to 660 nm (violet to red to  
92 a human observer; hereafter, visual stimuli are referred to as they are perceived by the human eye without  
93 implying that mosquitoes have the same subjective experience of color), with each visual stimulus having  
94 the same approximate contrast with the background (Fig. 1g). While investigating the visual objects, the  
95 mosquitoes would fly upwind and hover immediately downwind of a visual object, at approximately 3–5  
96 cm, while exhibiting brief excursions before returning to the objects (Fig. 1e). During CO<sub>2</sub> release, the  
97 same total number of mosquitoes was recruited to the visual objects of differing hues (Supplementary Fig.  
98 S1e). Relative to the white control object, however, the mosquitoes preferred certain hues, such as cyan,  
99 red, and orange,

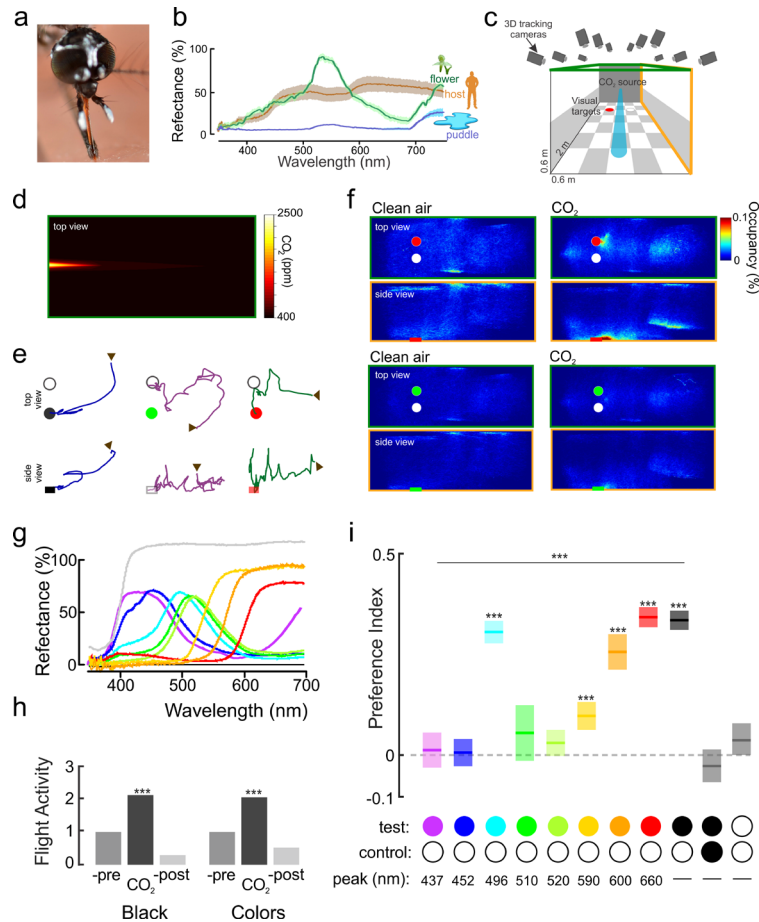

100

101 **Figure 1. Olfactory gating of mosquito color preference.** (a) The *Ae. aegypti* eye. The retina is composed of ~300-400 ommatidia and ranges  
 102 in spectral sensitivity from the near-ultraviolet (300 nm) to orange-red (600-700 nm) wavelengths. Image courtesy of Raúl Pardo (with  
 103 permission). (b) Spectral reflectance of behaviorally important objects for *Ae. aegypti* females: human skin (brown line); flower (*P. obtusata*;  
 104 green line) and small puddle filled with *Ae. aegypti* larvae (blue line). (c) Wind tunnel system with real-time tracking system, odor and visual  
 105 stimulation. (d) Heat map of the CO<sub>2</sub> plume in the wind tunnel. (e) Example of individual trajectories (top: [x-,y-axes], bottom: side view [x-,z-  
 106 axes]). The arrows represent the start of a trajectory and the circles are the visual objects. (f) Heat (occupancy) maps showing the distribution of  
 107 female mosquitoes without (left panels) and with CO<sub>2</sub> delivery (right panels) while in presence of a white and a red objects (top), or white and  
 108 green objects (bottom). The position of the plots shows the top and side views of the tunnel working section. (g) Reflectance of the visual stimuli  
 109 used in the experiments. (h) Relative flight activity between the different phases of the experiments (pre-, CO<sub>2</sub> and post-CO<sub>2</sub>) as the number of  
 110 trajectories recorded during one phase divided by the number of trajectories recorded in the previous phase. There were no significant differences  
 111 in the relative activity during the CO<sub>2</sub> phase when the tested visual object was black versus objects of different hues (Kruskal-Wallis test, df = 1,  
 112 Chi-sq = 0.01, P = 0.92), although for both groups CO<sub>2</sub> significantly elevated the number of flying mosquitoes compared to the filtered Air  
 113 treatment (P < 0.002). (i) Mean preference index for the test object (black, or different hues) vs. the control (white) object. There was a significant  
 114 effect of hue on the attraction to the tested object (Kruskal-Wallis test, Preference index ~ pair of visual stimuli used: df = 8, Chi-sq = 597.23, P <  
 115 0.0001). Several hues were significantly more attractive than the control, white object (one-sample t-test: \*\*\*; P < 0.001). Boxplots area the mean  
 116 (line) with 95% confidence interval (shaded area) (n = 25,529; 17,729; 53,786; 23,694; 34,343; 31,037; 32,257; 24,774; 42,595; 20,929; and  
 117 48,198 mosquito trajectories for the all-white, all-black, black-and-white, Bv-T2, Bw-, Gw-T1, Gc-, YGc-, Yw-, O- and R-Hue treatments,  
 118 respectively).  
 119

120 as demonstrated by their focused clustering around the object (Fig. 1e). By contrast, other hues (violet,  
 121 blue, green, and green-yellow) elicited no attraction responses compared to the white object (Fig. 1e, i).  
 122 Across all hues, CO<sub>2</sub> had a strong effect on flight velocity and duration, but there were no significant  
 123 differences between treatments (Supplementary Fig. S1b, d; Kruskal-Wallis test: Chi-square < 16.82, P >  
 124 0.11), demonstrating that the presence of CO<sub>2</sub> is necessary for attraction to specific hues and that visual

125 preference did not result from higher flight velocity increasing the probability of a mosquito randomly  
126 encountering a visual object.

127 To further investigate mosquito spectral preferences, a preference index value (defined as the  
128 time spent investigating a colored object minus the time investigating the white object, divided by the  
129 sum of the times spent investigating the colored and white objects) was calculated for each mosquito that  
130 investigated a visual object. The hues differed significantly in terms of mosquito preference (Fig. 1i,  
131 Kruskal-Wallis test:  $df = 8$ , Chi-square = 597.23,  $P < 0.0001$ ); several hues were more attractive to  
132 mosquitoes than the white object that served as a non-attracting control (Fig. 1i, one-sample t-test:  $P <$   
133  $0.001$ ). As the hues transitioned from green to red, the attractiveness of the object also increased. For  
134 instance, orange and red visual objects were strongly preferred by female mosquitoes (multiple  
135 comparison Kruskal-Wallis test:  $P < 0.05$ ), whereas green, blue, and violet objects were not more  
136 attractive than the white control object (multiple comparison Kruskal-Wallis test:  $P > 0.05$ ). However,  
137 mosquitoes were not strictly attracted to the longest wavelengths, as they were also significantly attracted  
138 to cyan objects (peak reflectance at 496 nm). As a control to test for the effect of visual object attraction  
139 relative to other regions of the working section, we examined the preference between the white (control)  
140 object and a randomly selected volume in the wind tunnel. Compared with the randomly selected volume,  
141 female mosquitoes investigated the white object significantly more in presence of  $CO_2$  (preference index  
142 =  $-0.53 \pm 0.03$  (mean  $\pm$  sem), one-sample t-test:  $P < 0.001$ ).

143

#### 144 ***Behavioral preferences for orange-red wavelengths reflected from human skin***

145 Across all skin tones, human skin has a strong signature in the long wavelength range (yellow, red) (Fig.  
146 2a)<sup>26</sup>, but it is unclear which bands in the human skin spectrum are most attractive to mosquitoes. To  
147 examine whether mosquitoes exhibit different preferences for certain spectral bands reflected by human  
148 skin, we first utilized color cards designed for cosmetics purposes to match human skin tones (Pantone  
149 SkinTone Guide) (Fig. 2a). Behavioral experiments were performed in the wind tunnel to individually test  
150 various faux skin tones (Y02, Y10, R10, and an unpleasant orange shade typical of individuals using  
151 cheap tanning lotion [which we designated “vile 45”]) using the white object as a control. Similar to the  
152 previous experiments, only during  $CO_2$  release did mosquitoes become highly attracted to skin tones (Fig.  
153 2c, e; Kruskal-Wallis test:  $df = 8$ , Chi-square = 184.37,  $P < 0.001$ ), exhibiting no behavior characteristic  
154 of attraction before exposure to  $CO_2$  (paired t-test:  $P = 0.09$ ). Moreover, the mosquitoes exhibited similar  
155 levels of attraction to each skin tone (Fig. 2c, e; Kruskal-Wallis test with multiple comparisons:  $P > 0.05$ ).

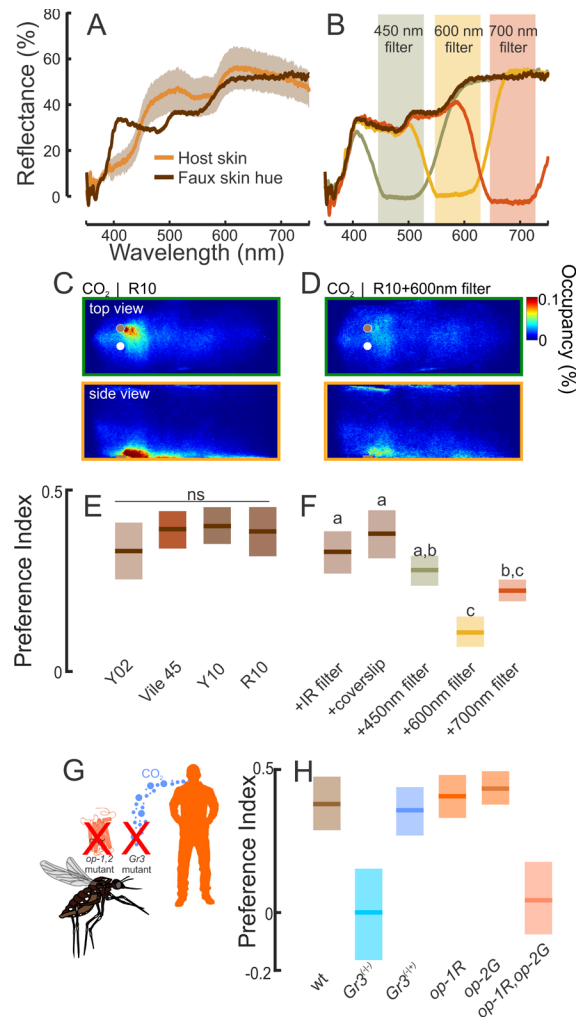

156

157 **Figure 2. The contribution of orange-red wavelengths in attraction to faux human skin.** (a) Spectral reflectance of human skin and faux skin  
 158 used in behavioral experiments. (b) Ultra-thin optical filters (450 nm, 600 nm, and 700 nm) attenuated discrete bands in the object's reflected  
 159 spectrum. (c, d) Occupancy maps of the mosquito's distribution around the visual objects during exposure to CO<sub>2</sub>. During CO<sub>2</sub>, mosquitoes were  
 160 significantly attracted to the faux skin color compared to the white (control) object (c). However, the optical filter attenuating the 550-630 nm  
 161 band reduced the numbers of mosquitoes investigating the faux skin color (d). (e, f) Mosquitoes significantly preferred the faux human skin  
 162 colors (E), although optical filters in the yellow to red wavelengths significantly decreased the attractiveness of the visual object (F). Boxplots are  
 163 the mean (line) with 95% confidence interval (shaded area); letters denote statistically significant differences between groups. (g) Testing a  
 164 mosquito line deficient in long-wavelength opsins (*opsin1* and *opsin2*), or unable to detect CO<sub>2</sub> (*Gr3* mutant) allowed us to examine the  
 165 contribution of olfactory and visual input into the attraction of human skin color. (h) Mean preference indices for the *Gr3* mutants (blue) and  
 166 opsin mutants (orange). All mosquito lines showed similar preferences to the white and skin color visual objects during exposure to filtered air  
 167 (Kruskal-Wallis test: df = 3, Chi-sq = 1.68, P = 0.64). However, during CO<sub>2</sub> the lines were significantly different from one another in their visual  
 168 preferences (Kruskal-Wallis test with multiple comparisons: df = 3, Chi-sq = 96.01, P < 0.001): only the heterozygote (*Gr3<sup>+/+</sup>*) and wild-type  
 169 (LVP) lines showed significant attraction to the skin color (one-sample t-test: P < 0.001), whereas the opsin double mutant line (*op-1/op-2*) and  
 170 the *Gr3<sup>-/-</sup>* mutants showed no attraction (one-sample t-test: P > 0.31). Boxplots area the mean (line) with 95% confidence interval (shaded area) (n  
 171 = 13,999; 15,035; 14,016; 48,624; 19,284; 20,713; 40,690; 26,135; 39,649; 16,208; 3,550; 9,277; 13,799; 10,948; and 5,679 mosquito trajectories  
 172 for the Y02, Vile 45, Y10, R10, IR filter, coverslip, 450nm filter, 600nm filter, 700nm filter, wt, *Gr3<sup>-/-</sup>*, *Gr3<sup>+/+</sup>*, *op1-R*, *op2-G*, and *op1-R,op2-G*  
 173 treatments, respectively).

174

175 To determine which region of the human skin visual spectrum is most attractive to mosquitoes,  
 176 we overlaid the R10 skin color card with optical filters to attenuate discrete bands (Fig. 2b). Whereas the  
 177 450-nm optical filter had no significant effect on behavioral attraction to the skin tone compared with the

178 positive controls (Fig. 2f; Kruskal-Wallis test with multiple comparisons:  $P > 0.58$ ), filters blocking  
179 longer wavelengths (550- to 700-nm) reduced the attractiveness of the visual object ( $P < 0.05$ ). In  
180 particular, application of the 600-nm filter was associated with a 300% reduction in attraction compared  
181 with the positive controls (Fig. 2c–f). Importantly, results for controls consisting of an overlaid infrared  
182 filter or a clear nylon coverslip did not differ significantly from the unmanipulated skin tone (Kruskal-  
183 Wallis test with multiple comparisons:  $P > 0.33$ ). To further examine the importance of visual and  
184 olfactory integration in controlling mosquito visual preferences, we examined single and double mutants  
185 of the long-wavelength photoreceptors *opsin-1* and *opsin-2* and a line with a mutation in the *Gr3*  
186 receptor<sup>14</sup>, which transduces CO<sub>2</sub> signals (Fig. 2g). Whereas the *Gr3*-heterozygote, *opsin-1* and *opsin-2*  
187 single mutants, and wild-type control mosquitoes were significantly attracted to the skin tone during CO<sub>2</sub>  
188 exposure (one-sample t-test:  $P < 0.001$ ), neither the *opsin-1,opsin-2* double mutant nor *Gr3* mutant were  
189 attracted to the skin tones (Fig. 2h; one-sample t-test:  $P > 0.31$ ).

190 The behavioral preference to the long wavelengths in the skin color cards may not reflect  
191 mosquito behaviors to the hues reflected from human skin. To examine this further, we tested mosquitoes  
192 in a smaller opaque cage (45 cm x 30 cm x 30 cm) where they were exposed to two small windows (16  
193 cm<sup>2</sup>) (Fig. 3a,b). The cage and its environs were constructed to minimize any uncontrolled contamination  
194 from thermal or olfactory cues, and the windows being made from clear, heat absorptive glass  
195 (Supplementary Fig. S2). The back of a hand was displayed in one window, and the back of a heat-  
196 protective white glove was displayed in the other window (as a control). Similar to the assays in the wind  
197 tunnel, we found that mosquitoes were highly activated by CO<sub>2</sub> (Fig. 3c-e), and this increased their visual  
198 attraction to visual stimuli, including skin (Fig. 3b, c, f; Kruskal-Wallis test:  $df = 2$ , Chi-square = 84.04,  $P$   
199  $< 0.001$ ). Mosquitoes showed no preference during control experiments with two white gloves displayed  
200 in the window, but significantly preferred skin (Fig. 3f; Kruskal-Wallis test with multiple comparisons:  $P$   
201  $< 0.001$ ). However, when optical filters were placed over the window, blocking the longer wavelengths  
202 (550- to 700-nm), the attraction was significantly reduced (Kruskal-Wallis test with multiple  
203 comparisons:  $P < 0.001$ ) and not significantly different from the negative control (Fig. 3f; Kruskal-Wallis  
204 test with multiple comparison:  $P = 0.34$ ). Collectively, these results demonstrate that the long-wavelength  
205 band of the visual spectrum plays an important role in determining mosquito attraction to skin color. In  
206 addition, knockout of either visual or olfactory detection receptors suppresses mosquito visual attraction  
207 to long-wavelength host cues.

208

209



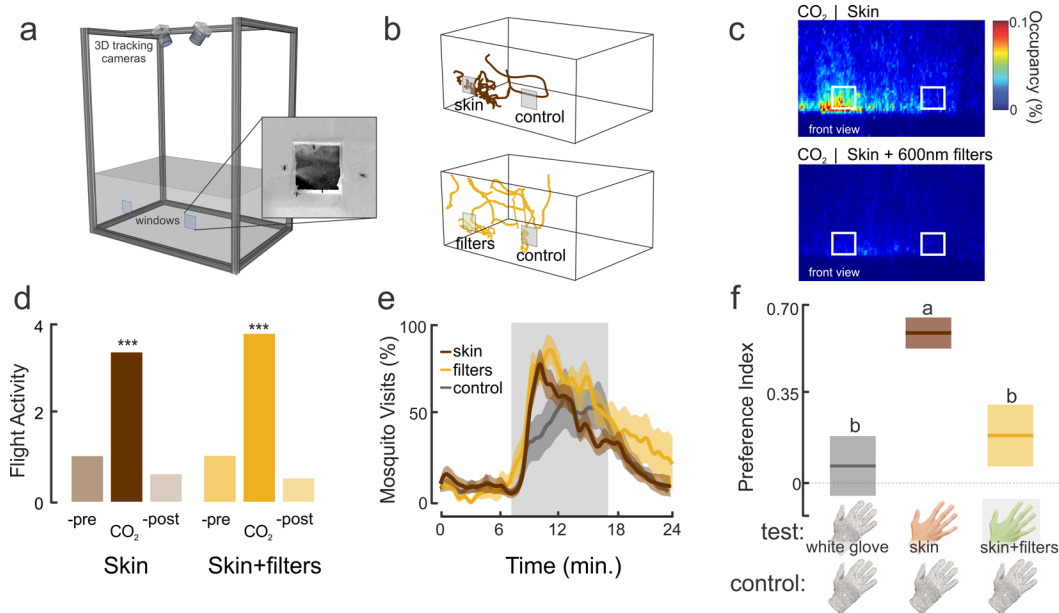

210

211 **Figure 3. The importance of long wavelengths in attraction to human skin.** (a) Cage assay with real-time tracking system, odor, and visual  
 212 stimulation through two windows on the front of the cage. (b) Example of individual trajectories (top: skin and control (white glove), bottom:  
 213 skin+filters (550-700nm) and control). (c) Heat maps showing the distribution of female mosquitoes during CO<sub>2</sub> stimulation while in presence of  
 214 the skin and control (top), and the skin+filters (550-700nm) and control (bottom). (d) Relative flight activity between the different phases of the  
 215 experiments (pre-, CO<sub>2</sub> and post-CO<sub>2</sub>). There was no significant difference in the relative activity during the CO<sub>2</sub> phase between the skin and  
 216 skin+600-nm filter treatments (Kruskal-Wallis test, df = 1, Chi-sq = 0.004, P = 0.96). (e) The percentage of mosquitoes visiting the windows over  
 217 the duration of the experiment. Few mosquitoes investigated the windows before the CO<sub>2</sub> exposure. However, exposure to CO<sub>2</sub> significantly  
 218 increased the numbers of mosquitoes visiting the windows relative to the pre-CO<sub>2</sub> period (Kruskal-Wallis test with multiple comparisons: df=5,  
 219 Chi-sq. = 277.85, P < 0.0001), although during CO<sub>2</sub> there were no significant differences in the total number of mosquitoes investigating the  
 220 windows between treatment groups (Kruskal-Wallis test with multiple comparisons: P > 0.57). Lines are the means and shaded areas the ±sem.  
 221 (f) Mean preference index for the different treatment groups (white glove vs. white glove, skin vs. white glove, and skin+filter (550-700nm) vs.  
 222 white globe). Boxplots area the mean (line) with 95% confidence interval (shaded area). Different letters denote statistically significant  
 223 differences between groups (Kruskal-Wallis test with multiple comparisons, P < 0.01). (n = 13,597 for the skin treatment group; n = 9,502 for the  
 224 for the skin+filters treatment group; and n = 9,368 for the control group).

225

### 226 *Spectral sensitivity of the Aedes eye*

227 The preference of mosquitoes for long wavelengths in the orange-red band motivated us to examine the  
 228 sensitivity of the *Ae. aegypti* retina by recording ERGs that extracellularly measure the summed responses  
 229 of retinal cells to visual stimuli (Fig. 4a). In the first series of experiments, a moving bar of differing hue  
 230 (blue [peak 451 nm], green [537 nm], or red [>600 nm], all at the same intensity; 18° wide at 30°/s  
 231 clockwise) was projected on a black background while conducting the ERG recordings (Fig. 4b). When  
 232 the moving bar reached the mosquito's visual field, the ERG exhibited a negative response that quickly  
 233 returned to baseline after the bar moved past the mosquito's field of view (Fig. 4b). A significant  
 234 difference in hue-evoked responses was observed (Kruskal-Wallis test: df = 3, 40.03, P < 0.001), with the  
 235 blue and green bars eliciting the strongest responses (Fig. 4b). Although responses to the red bar were

236 significantly weaker, the red hue still elicited ERG responses that were significantly higher than the  
237 baseline and those of the no-stimulus controls (Wilcoxon signed-rank test:  $P < 0.001$ ).

238 To further characterize mosquito spectral sensitivity, we used a scanning monochromator to  
239 examine ERG responses across the near ultraviolet (UV) to far-red wavelength range (350–750 nm). *Ae.*  
240 *aegypti* exhibited the highest sensitivity to violet (410 nm, 3.2 mV) and cyan-green wavelengths (520 nm,  
241 2.8 mV) (Fig. 4c, d). Strong ERG responses (0.47–1.27 mV) were still noted in the yellow-red  
242 wavelengths, although at  $>700$  nm, the responses decreased to approximately 0.25 mV, which was still  
243 significantly higher than the baseline control (Wilcoxon signed-rank test,  $P < 0.03$ ).

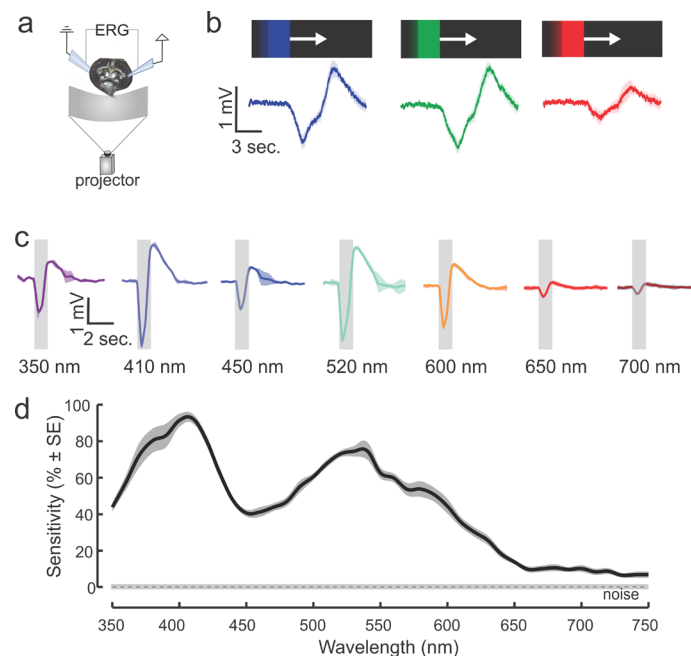

244

245 **Figure 4. Retinal sensitivity to visual stimuli.** (a) Experimental setup for the ERG experiments. A moving bar of different hue values (all at the  
246 same intensity,  $18^\circ$  wide at  $30^\circ/\text{s}$  clockwise) was projected on a black background while conducting the ERG recordings. (b) Electrorretinogram  
247 responses to a blue, green or red moving bar (mean  $\pm$  sem;  $n = 7$  mosquitoes). Responses to the moving object were significantly higher than the  
248 baseline for all tested hues (blue, green or red), although blue and green bars elicited higher responses (Kruskal-Wallis test, Amplitude responses  
249  $\sim$  color moving bar,  $df = 2$ ,  $40.03$ ,  $P < 0.001$ ,  $n = 7$  mosquitoes). (c) ERG responses to pulses of light ranging from 350 to 750 nm in 10 nm  
250 intervals. Traces are the mean responses (shaded area is the  $\pm$ sem;  $n = 8$  mosquitoes) to discrete wavelengths showing the elevated responses to  
251 violet (410 nm) and cyan-green (520 nm) hues. (d) Retinal sensitivity curve across the tested wavelengths from 350 to 750 nm (10 nm intervals).  
252 Two maxima occurred at the violet (420 nm) and green ( $\sim$ 530 nm) wavelengths, although responses were still significantly elevated above the  
253 noise at wavelengths more than 650 nm (t-test, ERG vs. noise:  $P < 0.01$ ).

254

### 255 *The role of visual contrast in determining mosquito preferences*

256 Mosquitoes are very sensitive to detecting dark objects that contrast highly with the background<sup>8,11</sup>. In the  
257 above experiments, we kept the total object contrast (400–700 nm) with the background approximately  
258 the same, but the mosquitoes' preference for red objects and skin tones motivated us to evaluate whether  
259 these responses were due to contrast alone (calculated as the Weber contrast, or the difference in spectral

260 irradiance reflected by an object and the background, divided by the sum of the two) or whether  
 261 mosquitoes can discriminate red-orange objects independently of intensity. As the first step in  
 262 determining how features of a visual stimulus impact mosquito visual preference, grey objects that  
 263 contrasted differently with the background were tested against a white control object (Fig. 5, Weber  
 264 Contrasts:  $-0.28$  to  $0.02$ ). Similar to the above results and across all tested stimuli, the presence of  $\text{CO}_2$   
 265 increased mosquito flight activity and the number of visits to the visual objects (Fig. 5c, Wilcoxon  
 266 signed-rank test, Air vs.  $\text{CO}_2$ :  $P < 0.001$ ). Female mosquitoes exhibited significantly greater attraction to  
 267 the majority of the grey visual objects than the white control object (Fig. 5d, one-sample t-test:  $P <$   
 268  $0.001$ ). However, when exposed to the lightest grey object, which closely approximated the background  
 269 and the white object, mosquitoes showed no preference for either object (Fig. 5d; Student's t-test:  $P =$   
 270  $0.33$ ). Overall, object darkness and contrast with the lighter background was significantly related to  
 271 mosquito preference, with mosquitoes investigating and preferring darker objects (Fig. 5d; Kruskal-  
 272 Wallis test:  $df = 5$ , Chi-square =  $634.16$ ,  $P < 0.001$ ). Although mosquitoes showed a distinct preference  
 273 for darker objects, mosquito flight velocity and duration did not significantly differ across treatments  
 274 (Kruskal Wallis test: Chi-square  $> 7.40$ ,  $df = 5$ ,  $P > 0.055$ ).

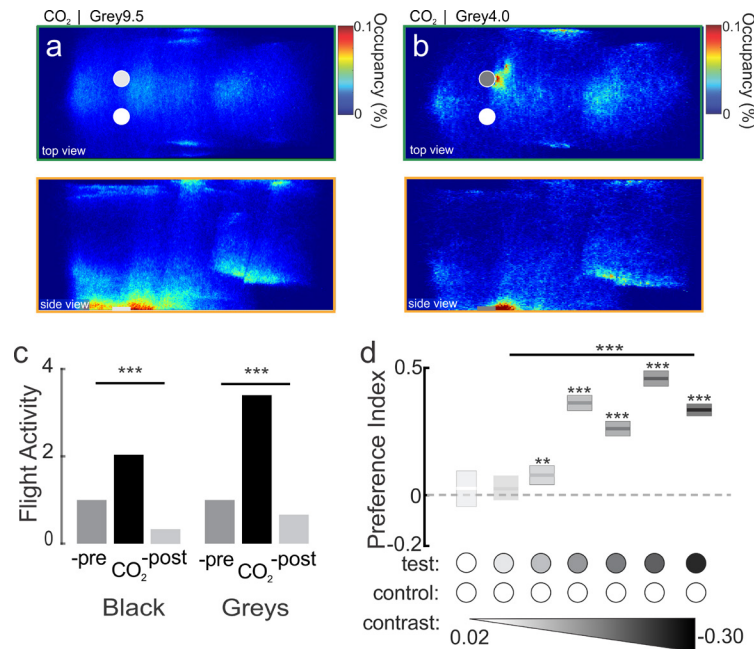

275 **Figure 5. The effect of achromatic contrast on mosquito attraction to visual objects.** (a) Occupancy map of the distribution of female  
 276 mosquitoes during  $\text{CO}_2$  delivery in presence of a white and a light grey object (Weber Contrast:  $-0.05$ ). The top plot is the top view of the  
 277 working section of the tunnel (x,y), and the bottom plot is the side view (x,z). (b) As in a, except the grey object has a higher contrast ( $-0.23$ ). (c)  
 278 Relative flight activity between the different phases of the experiments (pre-,  $+\text{CO}_2$  and post- $\text{CO}_2$ ). Mosquitoes exhibited similar flight activities  
 279 across all tested visual objects (Kruskal-Wallis test,  $df = 1$ , Chi-sq =  $3.24$ ,  $P = 0.07$ ). (d) Mean preference index for the test (grey, or black) vs.  
 280 control object (white) with 95% confidence interval ( $n = 12,764$ ;  $27,537$ ;  $37,085$ ;  $28,644$ ;  $36,050$ ;  $25,896$ ; and  $21,514$  mosquito trajectories for  
 281 the white, grey9.5, grey6.5, grey4.5, grey4.0, grey2.5, and black treatments, respectively). Object contrast had a significant effect on the attraction  
 282 to the tested object (Kruskal-Wallis test: Preference Index  $\sim$  contrast tested object,  $df = 5$ , Chi-sq =  $634.16$ ,  $P < 0.001$ ). All grey objects were  
 283 significantly more attractive than the control, white object (one-sample t-test, \*\*:  $P < 0.01$ , \*\*\*:  $P < 0.001$ ) except for the lightest grey object ( $-$   
 284  $0.05$ ), which was not more attractive (one-sample t-test:  $P = 0.33$ ).

285 ***Effects of contrast and color locus discrimination on Aedes preferences***

286 Given the difference between high retinal sensitivity to medium-long (green) wavelengths, lack of  
287 attraction to green objects, and the relatively low ERG sensitivity to long (orange/red) wavelengths but  
288 strong behavioral attraction to those objects, we asked the following question: what role does the darkness  
289 of the object (i.e., its contrast) have on behavioral preferences *versus* the object's hue? Although we  
290 lacked the photoreceptor tunings that would allow us to normalize the inputs between spectral channels,  
291 we experimentally manipulated object contrast to equalize the perceptual contrast of the objects to the  
292 mosquitoes and then examined the mosquito's ability to discriminate between different bands of the  
293 visual spectrum.

294 We first performed behavioral experiments in which we altered the darkness of the grey objects  
295 to determine the contrast that matched the attraction shown to the red hue (Fig. 6a, b). Across a range of  
296 grey contrast levels, the red hue was significantly more attractive to the mosquitoes than the grey objects  
297 (Fig. 6a, c, e; Kruskal-Wallis test: Chi-square = 149.75, df = 6,  $P < 0.0001$ ). As the grey objects became  
298 darker, however, they became more attractive to the mosquitoes, and the strong preference for the red hue  
299 decreased (Fig. 6e). The attractiveness of the red hue equaled that of the darkest grey and black objects  
300 (Fig. 6e; one-sample t-test:  $P = 0.07$  and  $P = 0.08$  for the darkest grey [grey 1.5] and black objects,  
301 respectively). We then determined which contrast of a green hue matched the attraction to the red object.  
302 For this purpose, we used the darkest grey object that was equally attractive as the red hue and tested it  
303 against different green objects (peak wavelength = 510 nm) that differed in terms of background contrast  
304 (Fig. 6b). The dark grey object was significantly more attractive than most green objects, but the darkest  
305 green object elicited the same level of attraction (Fig. 6f; preference index =  $-0.01$ ; one-sample t-test:  $P =$   
306  $0.66$ ).

307 To determine whether mosquitoes can discriminate between objects of different hues but similar  
308 levels of apparent contrast, we tested attraction to the red hue *versus* the darkest green (Fig. 6g, h). During  
309 exposure to CO<sub>2</sub>, mosquitoes were strongly attracted to the red hue but not the dark green (Fig. 6g, h; one-  
310 tailed t-test:  $P < 0.0001$ ). We also determined whether mosquitoes could discriminate between closely  
311 related color loci. For this purpose, we matched the apparent contrast of the non-attractive blue hue to an  
312 attractive grey and then subsequently compared mosquito responses to cyan (another attractive hue) and  
313 dark blue, as well as cyan and dark green. Similar to the results observed with the red hue, mosquitoes  
314 significantly preferred the cyan objects over the dark green or dark blue objects (Fig. 6h; one-tailed t-test:  
315  $P < 0.0001$ ). Thus, mosquitoes easily discriminated between color hues even when the object contrasts  
316 matched.

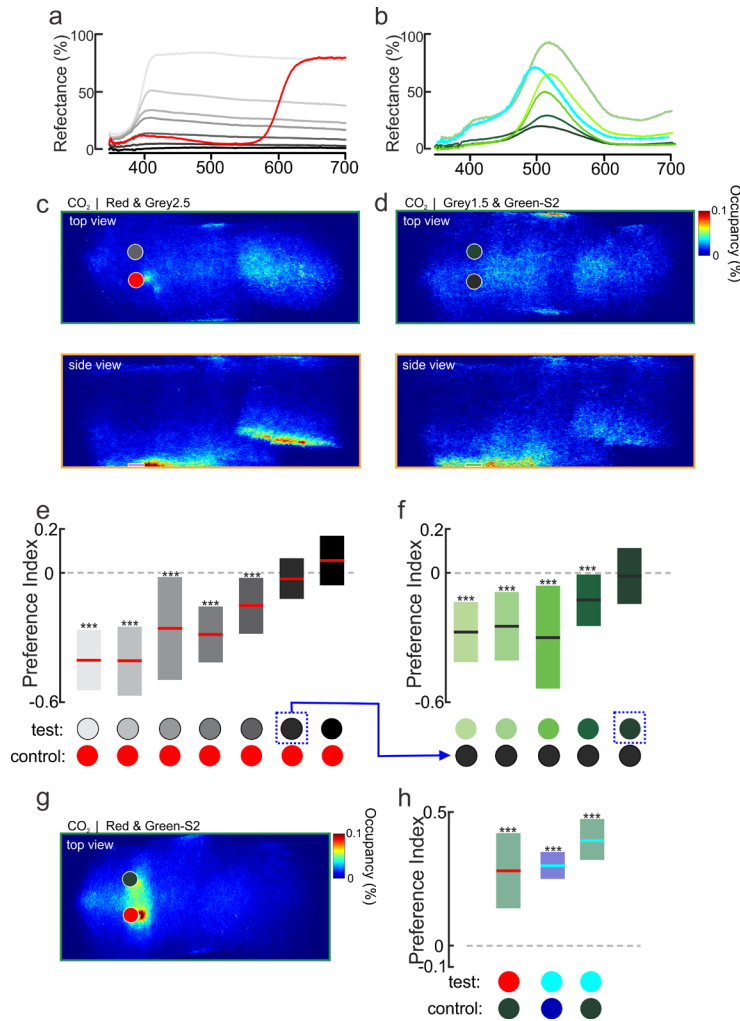

317

318 **Figure 6. The role of hue versus contrast in mosquito visual attraction.** (a) Spectral reflectance of red (R-Hue), black, and grey objects used  
 319 in the experiments: Grey 9.5, 6.5, 4.5, 4.0, 2.5, and 1.5, with Weber contrast values of -0.17, -0.30, -0.05, -0.10, -0.20, -0.24, -0.27, and -0.28,  
 320 respectively. (b) Spectral reflectance of cyan and green objects used in the experiments: Gw-T1, Gw-T3, Gc-T1, Gc-Hue, G-S1, and G-S2, with  
 321 Weber contrast values of -0.18, -0.11, -0.17, -0.20, -0.25, and -0.27, respectively. (c, d) Occupancy maps showing the distribution of female  
 322 mosquitoes during CO<sub>2</sub> delivery in presence of the red (R-Hue) and Grey2.5 objects (c), or green (G-S2) and Grey1.5 objects (d); both the green  
 323 and Grey1.5 have the same levels of contrast with the background (Weber Contrasts of -0.27). The upper and lower plots correspond to the top  
 324 (x,y) and side (x,z) views of the wind tunnel. (e) Mean preference indices ( $\pm$ CI) for the red versus grey objects with different levels of contrast  
 325 with the background. As the grey object's contrast increased and became darker, the relative attraction to the red object decreased, until at  
 326 Grey1.5 (Weber Contrast value of -0.28) the preference was not significantly different from 0 (one-sample t-test:  $P = 0.07$ ). (f) The Grey1.5  
 327 object was subsequently used in experiments testing the attractiveness of green objects with different levels of contrast (blue arrow from E). The  
 328 grey object was significantly more attractive than the majority of the tested green objects (one-sample t-test:  $P < 0.001$ , denoted by asterisks),  
 329 although the darkest green (G-S2; Weber Contrast = -0.27) was not significantly different from 0 (one-sample t-test:  $P = 0.66$ ) ( $n = 10,098$ -  
 330 15,578 trajectories for each tested object). (g) As in c, occupancy maps showing the distribution of trajectories around the red and dark green  
 331 objects. (h) Mean preference indices ( $\pm$ CI) for red versus dark green objects, and cyan versus dark blue or dark green objects. The dark green and  
 332 dark blue objects, with similar apparent contrasts to the red or cyan objects, were tested as the controls. Mosquitoes significantly preferred the red  
 333 and cyan objects over the dark green or dark blue objects (one-sample t-test:  $P < 0.0001$ , denoted by asterisks). For panels e, f and h, boxplots  
 334 area the mean (line) with 95% confidence interval (shaded area), and asterisks denote  $P < 0.001$  (one-sample t-test) ( $n = 7,191 - 27,717$  mosquito  
 335 trajectories for each tested object).

336

337 By incorporating object contrasts, reflectance values, and peak wavelengths as independent  
 338 variables into a series of linear models, the results of the behavioral tests offered a means to examine the

339 relative contributions of these variables toward mosquito preferences. In these models, all possible  
340 combinations were tested, and the best model was selected based on its Akaike Information Criterion  
341 (AIC) score, where the AIC estimates the value of each model and lower scores reflect the quality of the  
342 statistical model. Using combinations of the independent variables, we found the best model (and hence,  
343 lowest AIC score) relied on object contrast and wavelength, and excluded reflectance (Supplementary  
344 Fig. S3a, b). But which hues might be critical for mediating these behaviors? To further explore the  
345 relationship between the specific wavelengths of an object's hue and its attractiveness, a series of linear  
346 models were run using a multivariate analysis (PCA) of each object's visual spectrum. The PCA analysis  
347 allowed reduction of highly collinear and dimensional spectral data into reduced components, which can  
348 then be used as independent variables in the model. The best model explained approximately 17% of the  
349 variance in hue attractiveness (Supplementary Fig. S3c) and indicated that preference is negatively  
350 correlated with the content of the green band (500 to 575 nm) in the object's visual spectrum  
351 (Supplementary Fig. S3d, e).

352

### 353 ***Comparison of color preference between mosquito species***

354 The strong and specific responses of *Ae. aegypti* to hues in the visual spectrum and the similarity in long-  
355 wavelength opsin gene expansion in other mosquito species<sup>22</sup> motivated us to examine the color  
356 preferences in *Anopheles (An.) stephensi* and *Culex (Cx.) quinquefasciatus* mosquitoes. To examine the  
357 color preferences in *An. stephensi* and *Cx. quinquefasciatus*, we first conducted ERG recordings of 7-day-  
358 old females and examined their retinal responses to discrete wavelengths from 350 to 750 nm (Fig. 7a).  
359 Both mosquito species exhibited the strongest response to UV-visible violet wavelengths (350–420 nm),  
360 and the second strongest response was observed in the cyan-green wavelengths (500–520 nm). The strong  
361 response of *An. stephensi* and *Cx. quinquefasciatus* to the UV wavelengths contrasted with that of *Ae.*  
362 *aegypti* (dashed line), which exhibited the strongest response in the violet range (Figs. 3d and 7b,c). All  
363 three species exhibited similar responses to the long wavelengths in the orange to red band (620–750 nm).

364 Are mosquito species' behavioral preferences for visual objects correlated with their ERG  
365 responses, and are their color preferences similar? To answer these questions, we tested the responses of  
366 *An. stephensi* and *Cx. quinquefasciatus* mosquitoes to blue, green, red, and black objects in the wind  
367 tunnel using a methodology similar to that used for *Ae. aegypti*, except at lower light levels (1.28  
368  $\mu\text{W}/\text{cm}^2$ ). As with the results for *Ae. aegypti*, exposure to CO<sub>2</sub> caused a doubling in the number of flying  
369 mosquitoes and increased the percentage of mosquitoes that investigated the visual objects 5.58- to 9.15-

370 fold relative to air-only treatment for *An. stephensi* and *Cx. quinquefasciatus*, respectively (Fig. 7d;  
 371 Kruskal-Wallis test:  $df = 2$ , Chi-square  $> 7$ ,  $P < 0.01$ ). However, in contrast to the tight clustering around  
 372 attractive visual objects by *Ae. aegypti* (Fig. 1f), occupancy maps showed that the responses of *An.*  
 373 *stephensi* and *Cx. quinquefasciatus* mosquitoes were much more diffuse (Fig. 7e, f). Nonetheless, *Cx.*  
 374 *quinquefasciatus* formed a clustering hotspot around the outlet of the odor plume nozzle that was much  
 375 stronger than the responses of the other two species (Figs. 1f; 7e,f). Although we tried to minimize the  
 376 odor nozzle's visual signature by using clear acrylic and tubing, *Cx. quinquefasciatus* mosquitoes might  
 377 have located the plume source based on the high CO<sub>2</sub> concentration or by seeing the nozzle to some  
 378 degree.

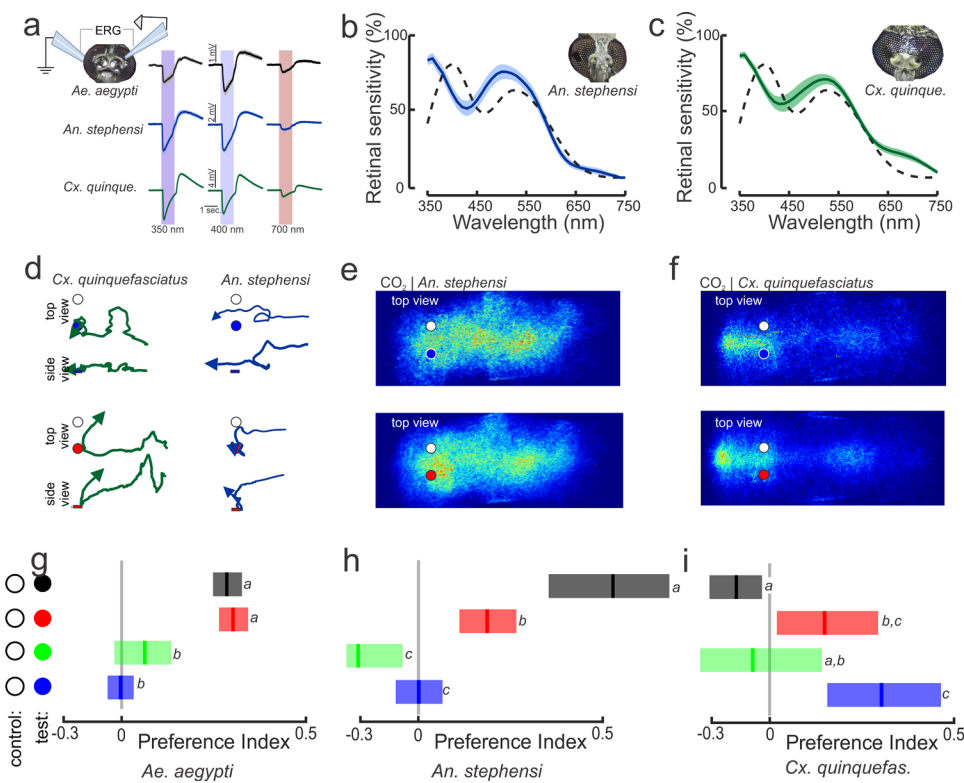

379

380 **Figure 7. Species-specific responses to hues.** (a) ERG recordings from *Ae. aegypti*, *An. stephensi* and *Cx. quinquefasciatus* mosquitoes. Traces  
 381 are responses to 1-sec. pulses of light in the 350 nm, 400 nm, and 700 nm bands. Each trace is the mean  $\pm$  sem of 7-9 mosquitoes/species. (b, c)  
 382 Retinal sensitivity to discrete wavelengths show that both *An. stephensi* (b) and *Cx. quinquefasciatus* (c) have the strongest responses in the UV  
 383 (360 nm) and green (520 nm) bands. The dashed line is the retinal sensitivity of *Ae. aegypti*. (d) Representative flight trajectories [(x,y) and (x,z)]  
 384 of *Cx. quinquefasciatus* (left) and *An. stephensi* (right) mosquitoes. *Cx. quinquefasciatus* showed a mild attraction to the blue object (top),  
 385 whereas *An. stephensi* showed an attraction to the red object (bottom). (e, f) Occupancy maps (x,y) of *An. stephensi* (e) and *Cx. quinquefasciatus*  
 386 (f) distribution around the blue (top) and red (bottom) objects during CO<sub>2</sub> exposure. (g-i) The preference indices for *Ae. aegypti* (g), *An. stephensi*  
 387 (h) and *Cx. quinquefasciatus* (i) in response to the black, red (R-Hue), green (Gc-T1), and blue (Bw-T1) objects. Lines are the means and shaded  
 388 bars are the confidence intervals, and letters above bars denote statistical comparisons (Kruskal-Wallis test with multiple comparisons:  $P < 0.05$ )  
 389 (for *Ae. aegypti*,  $n = 29,254$ ; 13,580; 18,190; and 12,086 trajectories; for *An. stephensi*,  $n = 5,817$ ; 9,134; 2,153; and 5,627 trajectories; and for  
 390 *Cx. quinquefasciatus*,  $n = 3,746$ ; 13,553; 4,238; and 2,835 for black, red, green, and blue treatments, respectively).

391

392 We next examined the preferences of the mosquito species for different spectral objects (black,  
393 blue, green, or red) relative to the white object (the non-attractive control). Similar to *Ae. aegypti*, when  
394 both *An. stephensi* and *Cx. quinquefasciatus* mosquitoes were subjected to filtered air treatment, they  
395 showed no preference for the black object or any of the spectral objects relative to the white control object  
396 (preference indices of -0.04 and 0.08 for *An. stephensi* and *Cx. quinquefasciatus*, respectively; Kruskal-  
397 Wallis test:  $df = 3$ , Chi-square  $< 3.66$ ,  $P > 0.30$ ). However, their spectral preferences changed when  
398 exposed to CO<sub>2</sub>. After encountering the CO<sub>2</sub> plume, *An. stephensi* preferred the black and red objects  
399 (Fig. 7h; Kruskal-Wallis test:  $df = 3$ , Chi-square = 38.6,  $P < 0.001$ ), but they were not significantly  
400 attracted to the blue or green objects (Fig. 7h; multiple comparison Kruskal-Wallis test:  $P > 0.05$ ). By  
401 contrast, *Cx. quinquefasciatus* mosquitoes preferred the blue and red objects (Kruskal-Wallis test:  $df = 3$ ,  
402 Chi-square = 13.6,  $P < 0.01$ ; with multiple comparisons:  $P < 0.05$ ) but were not significantly attracted to  
403 the green or black objects (Fig. 7i; multiple comparison Kruskal-Wallis test:  $P > 0.05$ ). Collectively, these  
404 results show that odor strongly sensitizes attraction to visual objects across mosquito species; however,  
405 spectral preferences can be species specific.

406

## 407 Discussion

408 Free-flight behavioral experiments with mosquitoes have shown that these insects integrate olfactory,  
409 visual, skin volatiles, and thermal cues to function efficiently and robustly in complex  
410 environments<sup>11,14,28</sup>. However, we know very little about mosquito visual-guided behaviors or how vision  
411 is involved in host selection. In this study, we utilized real-time tracking of mosquito behaviors in a large  
412 wind tunnel. The wind tunnel system enables control of aerodynamic conditions to structure the odor  
413 plume and allow the plume and visual objects to be decoupled in time and space. Both are important  
414 considerations when testing olfactory-visual integration. In this study, and similar to our previous work  
415 using achromatic objects<sup>11,28</sup>, the presence of CO<sub>2</sub> increased mosquito responses to colored objects in a  
416 hue-specific manner. Both chromaticity and contrast were important components in visual object  
417 attraction and could partly explain mosquito preferences for objects that appear orange and red to human  
418 observers. These results were qualitatively similar to those reported by Smart and Brown (1957), who  
419 examined the landing responses of mosquitoes on colored cloth in a field<sup>17</sup>. The results of their study  
420 showed that mosquitoes (*Aedes* sp.) are attracted to red and black cloths, with darker colors being more  
421 attractive than lighter shades<sup>17</sup>. Our ERG results and wind tunnel assay data suggest that mosquitoes can  
422 detect and are attracted to the long wavelength bands in the orange and red portions of the human visual  
423 spectrum, although if objects contrast highly with the background and/or are darker, then they become  
424 more attractive. The demonstrated spectral preferences of mosquitoes and their lack of attraction to lighter



425 colors, with dominant bands in the blue and green regions, impacted the fashion industry in the early  
426 twentieth century. For instance, Nuttall and Shipley (1902)<sup>29</sup> suggested wearing khaki pants would be  
427 appropriate for ensembles in a tropical environment, and the US military changed its dress shirts from  
428 dark blue to light blue in part to mitigate mosquito biting<sup>30</sup>. Nonetheless, a key question is what drives  
429 these responses in mosquitoes, particularly the attraction to darker and higher-contrast colors? An  
430 important component could be the visual OFF responses to the visual background<sup>31</sup>. In our wind tunnel,  
431 we projected a light grey checkerboard pattern on the bottom of the tunnel to provide optic flow and  
432 contrast with the visual objects. The lack of opsins for the red hue could cause an OFF response in  
433 downstream neurons that receive input from the photoreceptors. One complication with this hypothesis is  
434 that mosquitoes still preferred the red hue when tested against a dark green object that matched it in  
435 apparent contrast, suggesting they have an ability to detect these long wavelengths. This was further  
436 demonstrated by the ERG responses to long (red) wavelengths. Recent work in *Drosophila* has shown  
437 that photopigments provide a mechanism for flies to detect orange and red wavelengths<sup>32</sup>, and it is  
438 possible that similar processes play a role in mosquitoes.

439         Although the contrast with a lighter background did impact the attraction responses of *Ae. aegypti*  
440 mosquitoes, the preferences for the red and cyan hues were greater than the apparent contrasts of the  
441 competing visual cues (green, or blue). The *opsin-1* and *opsin-2* genes, which are tuned to the green to  
442 orange band of the visual spectrum, are highly expressed in the mosquito retina. The results of this study  
443 and those reported elsewhere<sup>25</sup> suggest that *opsin-1* and *opsin-2* play important roles in determining  
444 object preference and visual attraction to human skin. Additional research will be needed to identify the  
445 opsins and neural circuits involved in small-field object detection and color preference and determine how  
446 odor modulates those responses.

447         Compared with other insects, such as honeybees or the tsetse fly, we know little about mosquito  
448 visual ecology or how visual cues are integrated with other senses in these insects. Whereas shallow pools  
449 of water can be rich in green and red wavelengths and flowers dominant in blue and green, hosts' skin is  
450 dominated by long wavelengths in the green to red band of the visual spectrum (Fig. 1b). Abundant work  
451 by the cosmetics industry has shown that human skin has a lower peak in the green wavelength (530 nm,  
452 ~20%) and a dominant reflectance in the orange to red wavelengths (>600 nm, 20–60%). The diurnal *Ae.*  
453 *aegypti* and nocturnal and crepuscular *An. stephensi* and *Cx. quinquefasciatus* mosquitoes are all active  
454 during periods in which these longer wavelengths are dominant. For example, *Ae. aegypti* exhibit peak  
455 activity in the mornings and late afternoons, and *An. stephensi* and *Cx. quinquefasciatus* mosquitoes are  
456 especially active during moonlit nights—both environments are long-wavelength shifted<sup>21,33,34</sup>. In this  
457 study, we show that mosquitoes are especially sensitive to long wavelengths (yellow to red) for host

458 detection; blocking these wavelengths can suppress object attraction. Moreover, we found that mosquitoes  
459 can distinguish between closely colored loci (Fig. 6h), even when their apparent contrasts match. Insect  
460 photoreceptors within an ommatidial cartridge transduce light intensity and spectral information. At the  
461 photoreceptor terminals, they also provide antagonistic inputs to downstream neuron targets, thus  
462 allowing discrimination of spectral inputs (termed ‘color opponency’). In *Drosophila melanogaster*, color  
463 opponency at the photoreceptor terminals plays an important role in their color discrimination and  
464 preference<sup>31</sup>, and it could be that similar processes are at play in mosquitoes. In a variety of insects,  
465 including flies, bees, and butterflies, spectrally sensitive photoreceptors form connections with  
466 transmedulla neurons that project into the lobula, where additional color and motion processing—  
467 including color opponency—occurs<sup>35-37</sup>.

468 It is important to note that our current experiments did not incorporate close-range cues from a  
469 host, such as heat, water vapor, or skin volatiles. These cues play critical roles in controlling landing and  
470 biting behaviors, and future work could determine how visual spectra are processed in tandem with these  
471 other stimuli. Nonetheless, previous work has shown that visual cues can promote mosquito orientation  
472 and search behaviors in combination with odor, heat, or water vapor<sup>11,14</sup>. The integration of multimodal  
473 stimuli in driving behavioral responses raises questions regarding how the sensory systems are linked in  
474 the brain. Odor stimulation increases visual responses in the object-detecting neuropil in the *Ae. aegypti*  
475 lobula<sup>28</sup>. Neuropil in this brain region is responsive to moving objects but not wide-field motion.  
476 Interestingly, whereas olfactory stimulation increases visual responses in the lobula, visual stimulation  
477 does not modulate glomerular responses in the antennal lobe, the primary site for processing olfactory  
478 information in the mosquito brain. Why might this occur? Mosquitoes have a relatively poor visual  
479 resolution (~10°); thus, vision may not provide fine-scale information about the identity of an object.  
480 Instead, an object’s odor may provide information about its identity, whereas vision can provide details  
481 regarding the location of the object.

482 Despite the potential importance, few studies have examined retinal responses to long  
483 wavelengths in mosquitoes<sup>23,24</sup>, and how peripheral and downstream visual circuits, such as those in the  
484 optic lobes, process this information remains unknown. Evolutionary analyses of long-wavelength opsins  
485 in diverse mosquito species have suggested these genes are functionally important. In *Ae. aegypti*,  
486 *Anopheles coluzzii*, and *Cx. quinquefasciatus*, these genes have undergone duplication events and may be  
487 under positive selection, explaining the commonalities in ERG responses. *Aedes aegypti* has 10 putative  
488 opsins, five of which are potential medium- to long-wavelength opsins in the adult (>500 nm)<sup>22</sup>. One of  
489 these genes, *opsin-1*, is expressed in the largest group of photoreceptor cells (R1-R6) in the *Ae. aegypti*  
490 eye<sup>23</sup>. The R1-R6 photoreceptors form a trapezoid-like structure in the ommatidial cartridge, with the R7

491 and R8 cells in the middle. Perhaps similar to *D. melanogaster* with rhodopsin-1 (Rh1), the *Ae. aegypti*  
492 *opsin-1* is likely involved in motion- and dim-light sensitivity<sup>38</sup>. The inner R7 and R8 photoreceptors are  
493 involved in color vision, and the *Ae. aegypti opsin-2* is expressed in the R7 photoreceptors located in  
494 distinct bands on the dorsal and ventral surfaces of the eye, and possibly used for navigation and biting  
495 behaviors. For mosquitoes, opsins that differ in spectral tuning can be co-expressed in the R7  
496 photoreceptor in the female retina (e.g., the long-wavelength *opsin-2* and short-wavelength *opsin-9*),  
497 thereby increasing their range in wavelength sensitivity<sup>39</sup>. This may contrast the opsin co-expression in *D.*  
498 *melanogaster* R7 cells in the dorsal region of the eye, where two short (UV)-sensitive opsins are co-  
499 expressed<sup>40</sup>, presumably to increase the spectral contrast with the green-absorbing opsins in the R8 layer.  
500 The opsin co-expression and broadening of spectral input in mosquitoes could be advantageous under  
501 low-light conditions, as photon capture would be maximized, thus allowing for detection of suitable hosts  
502 or perhaps sources of nectar<sup>39,41</sup>, but this advantage would come at the cost of detection of particular  
503 wavelength bands. In our study, however, mosquitoes were able to discriminate between distinct and  
504 overlapping spectral bands (green and red; cyan and green, and cyan and blue, respectively), all at the  
505 same apparent contrasts, suggesting that other opsins, perhaps in the R8 cells, or downstream circuits,  
506 play a role in increasing the separability of those hues.

507         Color vision plays a critical role in a diverse array of insect vectors, and it is integrally tied to  
508 olfaction. For instance, traps that incorporate visual and olfactory cues have proven transformative as a  
509 low-cost method for controlling tsetse flies in parts of Africa<sup>42</sup>. Like *Ae. aegypti*, the majority of tsetse  
510 flies (e.g., *Glossina morsitans morsitans* and *G. pallidipes*) locate hosts based on smell, and once they are  
511 within close range (<10 m), visual cues cause the insects to investigate and potentially bite if the object is  
512 a host. Beginning with Vale (1974)<sup>43</sup> and continuing into the 1990s, researchers found that flies are most  
513 attracted to a specific blue (approximately 460 nm), followed by red and black, but they are not attracted  
514 to green and white<sup>5,6</sup>. Researchers subsequently found that incorporating blue and black hues in traps was  
515 particularly effective at inducing flies to come into contact with insecticide-treated screens. *Triatoma*  
516 *infestans* (i.e., the kissing bug) is another example of an insect that integrates odor and visual cues to  
517 mediate attraction to targets. An aggregation pheromone gates the attraction of *T. infestans* to colored  
518 objects, including the red, blue, and black hues, although the bugs always reject green (approximately 525  
519 nm) and white hues<sup>7</sup>. In a similar manner, our results obtained from tests of different mosquito species  
520 demonstrate the importance of olfaction in mediating mosquito color preferences. In the absence of CO<sub>2</sub>,  
521 mosquitoes did not demonstrate any preference between white and colored objects, but they became  
522 attracted to specific hues in the presence of CO<sub>2</sub>. However, there were species-specific differences in the  
523 attractive hues. Whereas *Ae. aegypti* was equally attracted to both red and black objects, *An. stephensi*  
524 was most attracted to black, followed by red objects. By contrast, *Cx. quinquefasciatus* was attracted to

525 blue, followed by red objects; surprisingly, however, this species was not attracted to small black objects.  
526 Collectively, the results of our current study and those of other studies show that the visual systems of  
527 insect disease vectors and their behaviors constitute attractive targets for the development of traps  
528 incorporating visual features that can be species-specific in terms of attraction, thus providing incentive to  
529 identify molecular targets that compromise mosquito olfactory-visual responses.

530

## 531 **Materials and Methods**

### 532 Mosquitoes, Odor Delivery, and Wind tunnel

533 Mosquitoes (*Aedes aegypti*: Rockefeller, Liverpool, *Gr3*[ECFP]<sup>14</sup> and *opsin-1*, *opsin-2* mutant lines;  
534 *Anopheles stephensi* (Indian strain) and *Culex quinquefasciatus*) were raised at the University of  
535 Washington campus. Mosquito lines were provided from BEI Resources (Manassas, VA, USA) (*Ae.*  
536 *aegypti*: Rockefeller, Liverpool, *Gr3*[ECFP]<sup>14</sup>; *An. stephensi* and *Cx. quinquefasciatus*). In the case of the  
537 *Ae. aegypti opsin-1*, *opsin-2*, and *opsin-1,opsin-2* lines, we used existing mosquito lines that were  
538 generated as previously described<sup>25</sup>. Briefly, the *op1* and *op2* alleles were generated by selecting short-  
539 guide RNAs (sgRNAs) that targeted the GPROp1 (LOC5568060) and GPROp2 (LOC5567680) loci<sup>25</sup>.  
540 Lines were homogenized and verified by PCR before testing<sup>25</sup>. Mosquitoes were raised in groups of 100  
541 individuals and anesthetized with cold to sort males from females after cohabitating for 7 days. At this  
542 time, more than 90% of the females have been mated, as indicated by their developing embryos. For each  
543 experimental trial in the wind tunnel, we released 50 females into the wind tunnel working section 3 h  
544 prior to the mosquito's subjective sunset (time period of peak activity for *Ae. aegypti*). Each visual  
545 stimulus was tested in 4 to 12 experimental trials (on average, approximately 5,575 trajectories were  
546 quantified per trial) and 12,300 *Ae. aegypti* were flown in total across all experiments, for a total of  
547 1,305,695 trajectories. After one hour, the 5% CO<sub>2</sub> plume (or filtered air in control experiments), was  
548 automatically released from a point source at the immediate upwind section of the tunnel and at a height  
549 of 20 cm and in the centerline of the tunnel. The CO<sub>2</sub> remained on for 1 hour, before switching off for  
550 another hour of filtered air (post CO<sub>2</sub>). The CO<sub>2</sub> and filtered air were automatically delivered using 2  
551 mass flow controllers (MC-200SCCM-D, Alicat Scientific, Tucson, AZ) that were controlled by a Python  
552 script that allowed synchronizing odor and filtered air delivery with the trajectory behaviors. The CO<sub>2</sub>  
553 plume was quantified using a Li-Cor LI-6262 CO<sub>2</sub>/H<sub>2</sub>O analyzer (Li-Cor, Lincoln, NE) for a total of 500  
554 locations throughout the tunnel (Fig. 1). Data yielded an exponential decay similar to a model of turbulent  
555 diffusion at the air flow (40 cm/s) and turbulent intensities (5%) of this tunnel, such that 20 cm from the

556 source and parallel to the wind flow the plume was approximately 1700 ppm (Fig. 1c, d), which is in the  
557 range of the plume of human breath.

558 All behavioral experiments took place in a low-speed wind tunnel (ELD Inc., Lake City, MN),  
559 with a working section of 224 cm long, 61 cm wide, by 61 cm high with a constant laminar flow of 40  
560 cm/sec (Fig. 1). We used 3 short-throw projectors (LG PH450U, Englewood Cliffs, NJ) and rear  
561 projection screens (SpyeDark, Spye, LLC, Minneapolis, MN) to provide a low contrast checkerboard on  
562 the floor of the tunnel and grey horizons on each side of the tunnel. The intensity of ambient light from  
563 the projectors was 96 lux across the 420-670 nm range. A 3D real-time tracking system<sup>11,44</sup> was used to  
564 track the mosquitoes' trajectories. Sixteen cameras (Basler AC640gm, Exton, PA) were mounted on top  
565 of the wind tunnel and recorded mosquito trajectories at 60 frames/sec. All cameras had an opaque  
566 Infrared (IR) Optical Wratten Filter (Kodak 89B, Kodak, Rochester, NY) to mitigate the effect of light in  
567 the tracking. IR backlights (HK-F3528IR30-X, LedLightsWorld, Bellevue, WA) were installed below and  
568 the sides of the wind tunnel to provide constant illumination beyond the visual sensitivity of the  
569 mosquitoes. The temperature within the wind tunnel, measured using ibuttons and FLIR cameras, was  
570 22.5°C and did not show any variability within the working section<sup>11,25</sup>. Ambient CO<sub>2</sub> was constantly  
571 measured outside of the tunnel and was approximately 400 ppm.

572

### 573 Visual Stimuli and Experimental Series in the Wind Tunnel

574 To determine the role of odor in the innate color preferences of mosquitoes, and identify the role of  
575 achromatic contrast and wavelength discrimination, a series of different experiments were conducted. In  
576 each experiment, two visual stimuli, separated by 18 cm, were presented to the mosquitoes on the floor in  
577 the upwind area of the tunnel and perpendicular to the direction of airflow. Visual stimuli consisted of  
578 paper circles that were 3 cm diameter (Color-aid Corp., Hudson Fall, NY, USA). Reflectance spectra for  
579 all the visual stimuli were characterized using an Ocean Optics USB2000 spectrophotometer with a  
580 deuterium tungsten halogen light source (DH2000) calibrated with a white Spectralon standard  
581 (Labsphere, North Sutton, NH, USA). The projector and working section light intensities (approximately  
582 100 lux) were measured using a cosine-corrected spectrophotometer (HR-+2000, Ocean Optics, Dunedin,  
583 FL, USA) 5 cm from the projector source (63  $\mu\text{W}/\text{cm}^2$ ). The achromatic contrasts of the visual objects  
584 relative to the background were measured using the calibrated spectrophotometer and the Weber contrasts  
585 calculated by the intensity of the object ( $I_{\text{object}}$ ) and background ( $I_{\text{background}}$ ), where ( $I_{\text{object}} -$   
586  $I_{\text{background}})/I_{\text{background}}$ . In the first experimental series, using *wt* (ROCK) *Ae. aegypti*, we examined the innate

587 preference of individual colors relative to the non-attractive white object. Tested colors were violet, blue,  
588 cyan, green, green-yellow, yellow, orange, and red (Bv-T2, Bw-, Gw-T1, Gc-, YGc-, Yw-, O- and R-Hue;  
589 Color-aid Corp.). These stimuli all had similar achromatic contrasts (-0.12 to -0.18) and peak reflectance  
590 values, but had distinct peak wavelengths (Fig. 1g). The position of the respective hue and white object in  
591 each replicate trial was randomized.

592 In the second experimental series, experiments were performed to examine which spectral bands  
593 of the human skin might attract mosquitoes. To ensure the replicability of the experiments, and enable  
594 the control of visual object humidity, temperature, and odor, we first elected to first use faux skin mimics  
595 (Pantone SkinTone Guide; Pantone LLC, Carlstadt, NJ 07072 USA). Using *wt* (ROCK) *Ae. aegypti*, we  
596 tested four different skin tones (R10, Y10, and Y02) and a skin tone that we named “vile 45”, which  
597 matched the putrid orange color from individuals who use cheap tanning lotion (PANTONE 16-1449X,  
598 Gold Flame). Similar to our previous wind tunnel experiments, each individual skin tone was paired with  
599 a white control object. To attenuate different spectral bands reflected from the skin tone, we used ultra-  
600 thin (~200 um thick) plastic filters that were placed over the object. Filters were selected to attenuate the  
601 450-530 nm band, the 550-630 nm band, or the 650-730 nm band (36-333 [notch filter], 35-894 [long-  
602 pass filter], and 35-896 [long-pass filter], respectively; Edmund Optics Inc., Barrington, NJ USA).  
603 Reflectance measurements of the object with the filters showed the transmission loss was <5% for bands  
604 outside of the filtered wavelengths (Fig. 2B). As a control to determine if attenuating a spectral band  
605 outside of the visual spectrum effects mosquito behavior, we used an IR filter that allows transmission of  
606 350-750 nm band of the visual spectrum (14-547 [KG2], Edmund Optics Inc., Barrington, NJ USA). To  
607 control for the physical effect that placing the plastic filter over the object may have had on mosquito  
608 behavior, we used plastic coverslips with the same refractive index as glass (72261-22; Electron  
609 Microscopy Services, Hatfield, PA USA). Experiments were also conducted with *Gr3<sup>-/-</sup>* mutants<sup>14</sup> and the  
610 *opsin-1<sup>-/-</sup>, opsin-2<sup>-/-</sup>* double mutants<sup>25</sup> to examine how loss of olfactory or visual detection, respectively,  
611 impacted mosquito attraction to the skin color. As controls, we used heterozygote (*Gr3<sup>+/-</sup>*), single mutants  
612 (*opsin-1<sup>-/-</sup>*, *opsin-2<sup>-/-</sup>*), and the wild-type (Liverpool) lines.

613 In the third series, the role of achromatic contrast, and not wavelength, on mosquito visual  
614 preferences was examined. Grey circles (3 cm diameter), differing in their Weber Contrast (-0.28 to -  
615 0.05) and ranging from near-black to very light grey (Greys 1.5, 2.5, 4.0, 4.5, 6.5, and 9.5; Color-aid  
616 Corp., Greyset), were run in combination with a white circle (Weber Contrast of 0.02). Similar to the  
617 above experiments, *wt* (ROCK) *Ae. aegypti* were used in the experiments.

618 In the fourth experimental series, we examined whether the spectral preferences of the mosquito  
619 (*Ae. aegypti* [ROCK]) while controlling for the apparent contrast of the different hues. We normalized the  
620 perceptual contrasts of the visual objects by testing a range of greys of different contrasts with the  
621 background (Greys 1.5, 2.5, 4.0, 4.5, 6.5, and 9.5 [Weber Contrasts of -0.28 to -0.05]; Color-aid Corp.,  
622 Greysset) in combination with, and against, the red object (R-Hue; Weber Contrast = -0.17). Once we  
623 identified the grey object that was as attractive as the red, identified by the PI that not significantly from 0  
624 (t-test:  $P > 0.05$ ), we then tested that grey (Grey 1.5; Weber Contrast = -0.28) against a range of different  
625 green objects that had the same peak wavelength (510 nm) but different Weber Contrasts, from light to  
626 dark (-0.11 to -0.27). Based on the green object that elicited the same level of attraction as the dark grey  
627 (PI = 0), we then tested the dark green versus the red object. Similar to experiments with the green  
628 objects, we tested the dark grey (Grey 1.5; Weber Contrast = -0.28) against a range of different blue  
629 objects that had the same peak wavelength (470 nm) but different Weber Contrasts, from light to dark (-  
630 0.13 to -0.28), followed by testing the red object versus the dark blue, and the attractive cyan (495 nm)  
631 object versus the dark blue or dark green objects with the same apparent contrast.

632

### 633 Visual Attraction to Skin in a Cage-Assay

634 To assay the visual attraction to the skin, acrylic cages (45 x 30 x 30 cm; McMaster-Carr; cat. #  
635 8560K171) were constructed to allow for video recording and tracking from above. Thermal insulation  
636 and white sheeting were wrapped around the cage's exterior to prevent any heat cues from outside of the  
637 cage while providing a uniform visual environment to the interior. One side of the cage was partially  
638 made from a white mesh allowing 5% CO<sub>2</sub> input to the cage. To conduct the visual preference assays, two  
639 4 x 4 cm windows, spaced 18 cm apart, were cut into the acrylic. Windows were sealed with heat  
640 absorptive glass (Schott KG2, Edmund Optics). Similar to the visual stimuli used in the wind tunnel  
641 experiments, mosquitoes were tested with a white "control" in one window (white glove), and the other  
642 window displaying either human skin, or human skin through long-wavelength optical filters (550-730  
643 nm band; 36-333 and 35-894 filters; Edmund Optics Inc., Barrington, NJ USA). Positions of the visual  
644 stimuli were randomized between experimental replicates. To test for any side preference or  
645 contamination in the cage, control experiments were also conducted using two white gloves as the visual  
646 stimuli in the windows. Experiments were performed in a chamber held at approximately 20 to 22.5°C,  
647 and the cage was situated underneath a hood ventilation system allowing air exchange. A CO<sub>2</sub> Flypad  
648 (Genesee Scientific; cat. # 59-119) was placed immediately adjacent to the side of the cage, and similar to  
649 the wind tunnel experiments, CO<sub>2</sub> was controlled by two mass flow controllers (MC-200SCCM-D, Alicat

650 Scientific, Tucson, AZ) via a Python script that allowed synchronizing odor and filtered air delivery with  
651 the trajectory behaviors. Filtered air was released for the first 8 minutes of each experiment, followed by  
652 the release of 5% CO<sub>2</sub> for 8 minutes, before switching off for another 8 minutes (post-CO<sub>2</sub>). Two cameras  
653 (Basler AC640gm, Exton, PA) were mounted above the cage and recorded mosquito trajectories at 100  
654 frames/sec. IR backlights (HK-F3528IR30-X, LedLightsWorld, Bellevue, WA) were installed above the  
655 cage. Human skin reflectance measurements and assays were from 3 males and 3 female wild type  
656 individuals on the University of Washington (Seattle) campus (ages 25-46 years old). Volunteers were  
657 from various backgrounds: Hispanic (one male), white (one male and one female), and Asian (one male  
658 and two females). Protocols were reviewed and approved by the University of Washington Institutional  
659 Review Board, and all human volunteers gave their informed consent to participate in the research. As the  
660 wind tunnel experiments, we used 6—8 day-old, non-blood-fed, mated females who were sucrose  
661 deprived for 24 hours but had access to water. We released 50 *Ae. aegypti* (ROCK) females into the cage  
662 for each experiment, and the assays were initiated 3 hr before lights off (ZT12). Ambient CO<sub>2</sub> was  
663 constantly measured both inside and outside of the cage.

664

665

666 Visual preferences in *Cx. quinquefasciatus* and *An. stephensi*:

667 *Anopheles stephensi* (Indian strain) and *Culex quinquefasciatus* mosquitoes were separately raised in  
668 groups of 100 individuals and anesthetized with CO<sub>2</sub> to sort males from females after cohabitating for 7  
669 days. At the time of their subjective sunset, groups of 50 female mosquitoes were released into the  
670 working section of the wind tunnel. After 1 h of filtered air, 5% CO<sub>2</sub> was released from a point source at  
671 the upwind section of the tunnel (height of 20 cm, and in the center of the tunnel) for 1 h, after which  
672 filtered air was released from the point source. The intensity of ambient light from the projectors was  
673 approximately 1.3 μW/cm<sup>2</sup>. The low light intensity, relative to that used with *Ae. aegypti*, was necessary  
674 to recruit females to the visual objects. At higher light intensities *An. stephensi* and *Cx. quinquefasciatus*  
675 mosquitoes responded to the CO<sub>2</sub> plume but they did not respond to the visual objects. We found that  
676 these two species began to investigate the visual objects only at light intensities <5 lux. Like our  
677 experiments with *Ae. aegypti*, the temperature within the wind tunnel was approximately 22.5°C.

678

679 Trajectories analysis:



680 Our tracking system is unable to maintain mosquito identities for extended periods of time, but we  
681 considered individual trajectories as independent for the sake of statistical analysis. Analyses were  
682 restricted to trajectories that were at least 90 frames (1.5 seconds) long. Only trajectories that lasted for  
683 more than 1.5 seconds were analyzed (average length trajectory: 3.1 sec., longest trajectory: 96.4 sec.,  
684 total number of 1,305,695). To examine the mosquito behaviors and preferences to the two visual stimuli  
685 in the tunnel, a fictive volume was created around the visual cues (area: 14x14 cm, height: 4 cm). The  
686 volume was centered over the object in the crosswind direction, and shifted slightly downwind in the  
687 wind line direction. This volume was chosen as it captures the area of primary activity of the mosquitoes.  
688 A sensitivity analysis was performed by adjusting the volume size and demonstrated that this volume best  
689 captured the mosquitoes investigating the visual objects while excluding mosquitoes transiting to other  
690 areas of the working section.

691 Occupancy maps were calculated by dividing the wind tunnel into 0.3-cm<sup>2</sup> squares. For each  
692 replicate experiment, the number of mosquito occurrences within each square was summed and divided  
693 by the total number of occurrences in all squares to yield a percentage of residency. We did not quantify  
694 landings on the spots due to limitations of the camera angles needed to identify landings. During the  
695 filtered “air” treatment, mosquitoes often investigated certain areas of the working section, such as the top  
696 or corners of the working section, causing hot spots in the occupancy maps. This is typical for mosquito  
697 activity without a stimulus. By contrast, when CO<sub>2</sub> is released, these hot spots are no longer apparent, and  
698 instead, the mosquitoes investigate the visual objects or navigate to the odor source, as demonstrated by a  
699 hot spot in the central area of the working section or near the odor source. For each mosquito line, the  
700 replicate trials were pooled to create a occupancy heatmap for the tested visual stimulus.

701 To calculate the fractions of trajectories that approached either visual object, for each trajectory  
702 we calculated a preference index by determining the amount of time a trajectory spent in each volume  
703 divided by the total time it spent in both volumes. If the trajectory spent all of its time in only one volume  
704 then it was assigned a preference index of 1 (test object) or -1 (white neutral object). Approximately 25 to  
705 50% of the trajectories approached either object. From these preference indices, we calculated the global  
706 mean, and bootstrapped the 95% confidence interval of the mean through random resampling of the  
707 individual trajectories 500 times. To determine whether the mosquitoes preferred the visual objects  
708 compared to elsewhere in the tunnel, we calculated the preference index for each trajectory at each time  
709 point as the amount of time the mosquito spent in a particular 4x14x14 cm volume that was randomly  
710 selected in the tunnel and compared them to the volumes containing the visual objects. Mean flight  
711 velocities were calculated from the 3D tracks of each individual trajectory. To further examine whether  
712 mosquito responses to the visual objects changed throughout the experiment, the percent of time (per each

713 minute interval) the mosquitoes investigated the visual objects was calculated. Statistically significant  
714 groups were estimated using a Kruskal-Wallis, Mann-Whitney *U*-test with Bonferroni correction at a  $P =$   
715 0.01 level, or the one-sample *t*-test. All recorded data were analyzed using Matlab (Mathworks, 2019a  
716 release).

717

#### 718 Electroretinogram (ERG) recordings

719 ERG recordings were performed by fixing 6 day-old, non-blood-fed female mosquitoes to a coverslip  
720 using Bondic glue. Mosquitoes were dark-adapted for 1 h prior to stimulation. The recording glass  
721 electrode (thin-wall glass capillaries; OD, 1.0 mm; length, 76 mm; World Precision Instruments, cat. #  
722 TW100F-3) was pulled using a micropipette puller (Sutter Instrument, p-2000), and filled with Ringer's  
723 solution (3 mM  $\text{CaCl}_2$ , 182 mM KCl, 46 mM NaCl, 10 mM Tris pH 7.2). The reference electrode, a  
724 sharpened tungsten wire, was placed into one compound eye in a small drop of electrode gel (Parker, cat.  
725 # 17-05), and the recording electrode was placed immediately on the surface of the contralateral eye. Two  
726 different types of visual stimuli were presented to the mosquitoes. In the first series, the mosquitoes were  
727 placed at the center of a semi-cylindrical visual arena (frosted mylar, 10 cm diameter, 10 cm high); a  
728 video projector (Acer K132 WXGA DLP LED Projector, 600 Lumens) positioned in front of the arena  
729 projected the visual stimuli. To test the response to moving objects, similar to what the mosquito might  
730 encounter in flight, we tested responses to a  $19^\circ$  wide bar moving from left to right (Clockwise) (Fig. 4).  
731 The mosquito was randomly tested with blue, green, and red bars (distinct peaks at 455, 547 nm, and 633  
732 nm, 18 lux), and each colored bar was tested 10-30 times per mosquito ( $n = 7$  mosquitoes).

733 The second stimulation method used a digital monochromator to examine responses to different  
734 wavelengths across the mosquito visual spectra (350-750 nm). Mosquitoes were exposed to a 1-sec pulses  
735 of light (10 lux) from a light source (35-watt Halogen; ThorLabs) and a fiber optic scanning  
736 monochromator (MonoScan 2000, Mikropak GmbH, Ostfildern, Germany) that provided control of the  
737 transmitted wavelengths ( $\pm 2$  nm). Light was transmitted via optical fibers (QP600-1-SR-B X, Ocean  
738 Optics, FL 32792, USA) and through a neutral density filter (fused silica, Thorlabs Inc., 0-1 OD). Each  
739 mosquito preparation was tested to wavelengths of 350-750 nm in 10 nm increments ( $n=8$   
740 mosquitoes/species). The visual stimuli were calibrated using a cosine-corrected spectrophotometer (HR-  
741 +2000, Ocean Optics, Dunedin, FL, USA) that was placed immediate to the recording preparation,  
742 allowing us to scale the irradiance of the tested stimuli. The light-induced responses were amplified by  
743 using an A-M Systems amplifier (10-100x; A-M Systems, 1800) and digitized using a Digidata data

744 acquisition system (Digidata 1550B, Molecular Devices, San Jose, CA 95134). Data were visualized and  
745 analyzed using Matlab software (Mathworks).

746

#### 747 Linear Models

748 Linear models were created using R 4.0.3 and the lm function with the default option. Comparison  
749 between models were performed using the AIC function that calculates the Aikaike's Information  
750 Criterion (AIC) for each model. For the first series of models, the dataset consisted of the mean  
751 preference index per experiment, the contrast value, peak wavelength and brightness value for the tested  
752 object. For the second series of models, the dataset contained the mean preference index per experiment  
753 and the area under the curve (AUC) of the reflectance measurement for the tested object calculated with  
754 bins of 25 nm from 350 to 675 nm. A Principal Component Analysis (PCA) was applied to the AUC  
755 vector to remove collinearity in the object's spectrum.

756

#### 757 **Data Availability**

758 Data on the behavioral and electroretinogram experiments can be found on Mendeley Data. Software is  
759 available on <https://github.com/riffelllab>.

760

#### **References**

- 761 1. Briscoe, A.D. and L. Chittka, *The evolution of color vision in insects*. Annual review of  
762 entomology, 2001. **46**(1): p. 471-510.
- 763 2. Hannah, L., A.G. Dyer, J.E. Garcia, A. Dorin, and M. Burd, *Psychophysics of the hoverfly:*  
764 *categorical or continuous color discrimination?* Current zoology, 2019. **65**(4): p. 483-492.
- 765 3. van der Kooi, C.J., D.G. Stavenga, K. Arikawa, G. Belušič, and A. Kelber, *Evolution of insect*  
766 *color vision: From spectral sensitivity to visual ecology*. Annual Review of Entomology, 2021.  
767 **66**.
- 768 4. Clements, A.N., *The biology of mosquitoes. Volume 2: sensory reception and behaviour*. 1999:  
769 CABI publishing.
- 770 5. Green, C., *Effects of colours and synthetic odours on the attraction of Glossina pallidipes and G.*  
771 *morsitans morsitans to traps and screens*. Physiological Entomology, 1986. **11**(4): p. 411-421.
- 772 6. Torr, S. and G. Vale, *Know your foe: lessons from the analysis of tsetse fly behaviour*. Trends in  
773 Parasitology, 2015. **31**(3): p. 95-99.
- 774 7. Reisenman, C.E., A.N. Lorenzo Figueiras, M. Giurfa, and C.R. Lazzari, *Interaction of visual and*  
775 *olfactory cues in the aggregation behaviour of the haematophagous bug Triatoma infestans*.  
776 Journal of Comparative Physiology A, 2000. **186**(10): p. 961-968.

- 777 8. Bidlingmayer, W.L. and D.G. Hem, *Mosquito (Dipteral Culicidae) flight behaviour near*  
778 *conspicuous objects*. Bulletin of Entomological Research, 2009. **69**(4): p. 691-700.
- 779 9. Kennedy, J.S., *The visual responses of flying mosquitoes*. Proceedings of the Zoological Society  
780 of London, A, 1939. **109**: p. 221-242.
- 781 10. WL, B., *How mosquitoes see traps: role of visual responses*. Journal of the American Mosquito  
782 Control Association, 1994. **10**: p. 272.
- 783 11. van Breugel, F., J.A. Riffell, A. Fairhall, and M.H. Dickinson, *Mosquitoes use vision to associate*  
784 *odor plumes with thermal targets*. Current Biology, 2015. **25**(16): p. 2123-2129.
- 785 12. Kline, D.L. and G.F. Lemire, *Field evaluation of heat as an added attractant to traps baited with*  
786 *carbon dioxide and octenol for Aedes taeniorhynchus*. Journal of the American Mosquito Control  
787 Association-Mosquito News, 1995. **11**(4): p. 454-456.
- 788 13. Lacey, E. and R. Cardé, *Activation, orientation and landing of female Culex quinquefasciatus in*  
789 *response to carbon dioxide and odour from human feet: 3-D flight analysis in a wind tunnel*.  
790 Medical and Veterinary Entomology, 2011. **25**(1): p. 94-103.
- 791 14. McMeniman, C.J., R.A. Corfas, B.J. Matthews, S.A. Ritchie, and L.B. Vosshall, *Multimodal*  
792 *integration of carbon dioxide and other sensory cues drives mosquito attraction to humans*. Cell,  
793 2014. **156**(5): p. 1060-1071.
- 794 15. Fay, R. and W. Prince, *A trap based on visual responses of adult mosquitoes*. . Journal of the  
795 American Mosquito Control Association-Mosquito News, 1968. **28**(1): p. 1-7.
- 796 16. Muir, L.E., B.H. Kay, and M.J. Thorne, *Aedes aegypti (Diptera: Culicidae) vision: response to*  
797 *stimuli from the optical environment*. Journal of Medical Entomology, 1992. **29**(3): p. 445-450.
- 798 17. MR, S. and B. AWA, *Studies on the responses of the female Aedes mosquito. Part VII—the effect*  
799 *of skin temperature, hue and moisture on the attractiveness of the human hand*. Bulletin of  
800 Entomological Research, 1957. **47**: p. 89.
- 801 18. Snow, W., *The spectral sensitivity of Aedes aegypti (L.) at oviposition*. Bulletin of Entomological  
802 Research, 1971. **60**(4): p. 683-696.
- 803 19. Brett, G., *On the relative attractiveness to Aedes aegypti of certain coloured cloths*. Transactions  
804 of the Royal Society of Tropical Medicine and Hygiene, 1938. **32**(1): p. 113-124.
- 805 20. Muir, L.E., M.J. Thorne, and B.H. Kay, *Aedes aegypti (Diptera: Culicidae) vision: spectral*  
806 *sensitivity and other perceptual parameters of the female eye*. Journal of Medical Entomology,  
807 1992. **29**(2): p. 278-281.
- 808 21. Trpis, M., McClelland, G. A., Gillett, J. D., Teesdale, C. and T.R. Rao. *Diel periodicity in the*  
809 *landing of Aedes aegypti on man*. Bulletin of the World Health Organization, 1973. **48**, 623-629.
- 810 22. Giraldo-Calderón, G.I., M.J. Zanis, and C.A. Hill, *Retention of duplicated long-wavelength*  
811 *opsins in mosquito lineages by positive selection and differential expression*. BMC Evolutionary  
812 Biology, 2017. **17**(1): p. 84.
- 813 23. Hu, X., J.H. England, A.C. Lani, J.J. Tung, N.J. Ward, S.M. Adams, K.A. Barber, M.A. Whaley,  
814 and J.E. O'Tousa, *Patterned rhodopsin expression in R7 photoreceptors of mosquito retina:*  
815 *Implications for species-specific behavior*. Journal of Comparative Neurology, 2009. **516**(4): p.  
816 334-342.
- 817 24. Hu, X., M.A. Whaley, M.M. Stein, B.E. Mitchell, and J.E. O'Tousa, *Coexpression of spectrally*  
818 *distinct rhodopsins in Aedes aegypti R7 photoreceptors*. PloS one, 2011. **6**(8): p. e23121.
- 819 25. Zhan, Y., D. Alonso San Alberto, C. Rusch, J. Riffell, and C. Montell, *Aedes aegypti vision-*  
820 *guided target recognition behavior requires two redundant rhodopsins*. BioRxiv, 2020: p. 1-30.

- 821 26. Angelopoulou, E., 1999. *The reflectance spectrum of human skin*. Technical Reports (CIS),  
822 p.584.
- 823 27. Lacey, E.S., A. Ray, and R.T. Carde, *Close encounters: contributions of carbon dioxide and*  
824 *human skin odour to finding and landing on a host in Aedes aegypti*. *Physiological Entomology*,  
825 2014. **39**(1): p. 60-68.
- 826 28. Vinauger, C., F. Van Breugel, L.T. Locke, K.K. Tobin, M.H. Dickinson, A.L. Fairhall, O.S.  
827 Akbari, and J.A. Riffell, *Visual-olfactory integration in the human disease vector mosquito Aedes*  
828 *aegypti*. *Current Biology*, 2019. **29**(15): p. 2509-2516. e5.
- 829 29. Nuttall, G.H. and A.E. Shipley, *Studies in relation to malaria. II.(Cont.) The structure and*  
830 *biology of Anopheles (Anopheles maculipennis)*. *Epidemiology & Infection*, 1902. **2**(1): p. 58-84.
- 831 30. Packard, A., *Color-preference in insects*. *Journal of the New York Entomological Society*, 1903.  
832 **11**(3): p. 132-137.
- 833 31. Schnaitmann, C., M. Pagni, and D.F. Reiff, *Color vision in insects: insights from Drosophila*.  
834 *Journal of Comparative Physiology A*, 2020. **206**(2), p.183-198.
- 835 32. Sharkey, C.R., J. Blanco, M.M. Leibowitz, D. Pinto-Benito, and T.J. Wardill, *The spectral*  
836 *sensitivity of Drosophila photoreceptors*. *Scientific Reports*, 2020. **10**(1), p.1-13.
- 837 33. Day, J.F., *Host-seeking strategies of mosquito disease vectors*. *Journal of the American Mosquito*  
838 *Control Association*, 2005. **21**(sp1): p. 17-22.
- 839 34. Silver, J.B., *Designing a Mosquito Sampling Programme*. *Mosquito Ecology: Field Sampling*  
840 *Methods*, 2008: p. 1-23.
- 841 35. Paulk, A.C., J. Phillips-Portillo, A.M. Dacks, J.-M. Fellous, and W. Gronenberg, *The processing*  
842 *of color, motion, and stimulus timing are anatomically segregated in the bumblebee brain*.  
843 *Journal of Neuroscience*, 2008. **28**(25): p. 6319-6332.
- 844 36. Swihart, S., *The neural basis of colour vision in the butterfly, Heliconius erato*. *Journal of Insect*  
845 *Physiology*, 1972. **18**(5): p. 1015-1025.
- 846 37. Yonekura, T., J. Yamauchi, T. Morimoto, and Y. Seki, *Spectral response properties of higher*  
847 *visual neurons in Drosophila melanogaster*. *Journal of Comparative Physiology A*, 2020. **206**(2):  
848 p. 217-232.
- 849 38. Leming, M.T., *Light-dark and circadian effects on the visual response of Aedes aegypti*. 2015:  
850 University of Notre Dame.
- 851 39. Hu, X., M.T. Leming, M.A. Whaley, and J.E. O'Tousa, *Rhodopsin coexpression in UV*  
852 *photoreceptors of Aedes aegypti and Anopheles gambiae mosquitoes*. *Journal of Experimental*  
853 *Biology*, 2014. **217**(6): p. 1003-1008.
- 854 40. Mazzoni, E.O., Celik, A., Wernet, M.F., Vasiliasuskas, D., Johnston, R.J., Cook, T.A., Pichaud,  
855 F., and C. Desplan. Iroquois complex genes induce co-expression of rhodopsins in Drosophila.  
856 *PLoS biology*, 2008 **6**(4): e97.
- 857 41. Peach, D.A., E. Ko, A.J. Blake, and G. Gries, *Ultraviolet inflorescence cues enhance*  
858 *attractiveness of inflorescence odour to Culex pipiens mosquitoes*. *PloS one*, 2019. **14**(6): p.  
859 e0217484.
- 860 42. Shaw, A.P., I. Tirados, C.T. Mangwiro, J. Esterhuizen, M.J. Lehane, S.J. Torr, and V. Kovacic,  
861 *Costs of using "tiny targets" to control Glossina fuscipes fuscipes, a vector of gambiense*  
862 *sleeping sickness in Arua District of Uganda*. *PLoS Neglected Tropical Disease*, 2015. **9**(3): p.  
863 e0003624.

- 864 43. Vale, G., *The responses of tsetse flies (Diptera, Glossinidae) to mobile and stationary baits.*  
865 Bulletin of Entomological research, 1974. **64**(4): p. 545-588.
- 866 44. Stowers, J.R., M. Hofbauer, R. Bastien, J. Griessner, P. Higgins, S. Farooqui, R.M. Fischer, K.  
867 Nowikovsky, W. Haubensak, and I.D. Couzin, *Virtual reality for freely moving animals.* Nature  
868 methods, 2017. **14**(10): p. 995-1002.

869

870

### Acknowledgements

871 We are grateful for the advice and discussions with C.E. Reisenman and F. Van Breugel. Support for this  
872 project was funded by Air Force Office of Scientific Research under grants FA9550-20-1-0422 (J.A.R.);  
873 the National Institutes of Health under grants R01-AI148300 (J.A.R.), R21-AI137947 (J.A.R.); and an  
874 Endowed Professorship for Excellence in Biology (J.A.R.). C.M. was supported by a grant (EY008117)  
875 from the NEI and from the U.S. Army Research Office and accomplished under cooperative agreement  
876 W911NF-19-2-0026 for the Institute for Collaborative Biotechnologies.

877

### Author contributions

878 D.A.S.A., C.R., and J.A.R. designed research; D.A.S.A., C.R., and J.A.R. performed wind tunnel  
879 experiments; C.R. and J.A.R. conducted electroretinogram experiments; A.D.S. assisted in visual  
880 stimulus, wind tunnel software, and experimental designs; Y.Z. and C.M. generated the opsin mutant  
881 lines. All authors wrote and edited the paper.

882

### Competing Interests

883 The authors declare no competing interests.

## Supplementary Information Figures and Legends

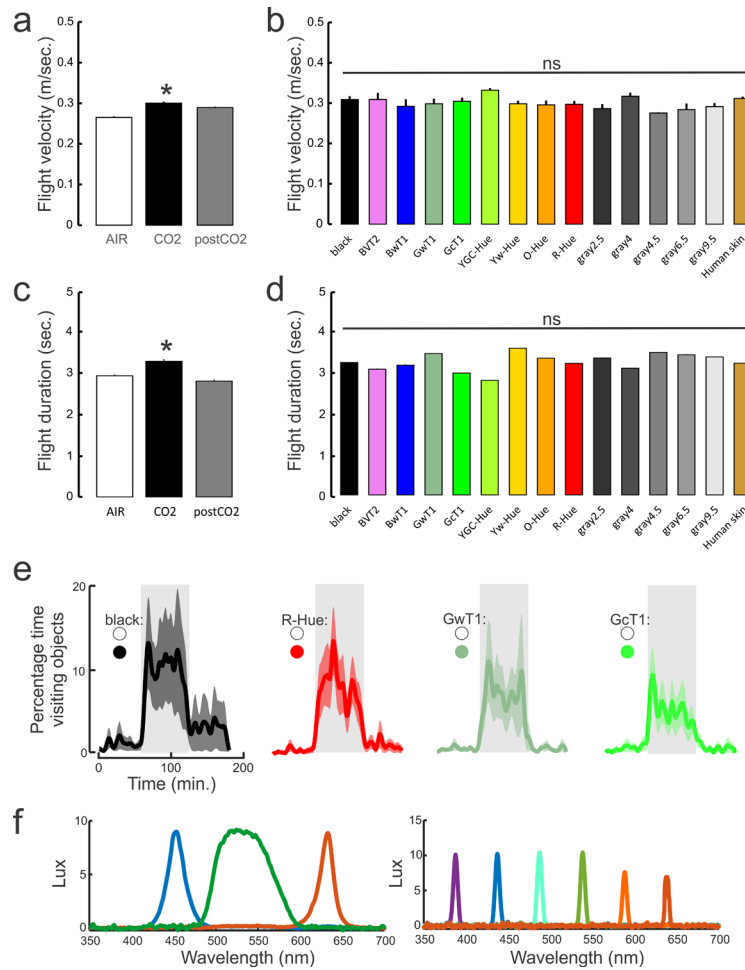

**Figure S1. Flight behaviors to different color stimuli, and characterization of stimuli in ERG experiments.** (a) Flight velocities of mosquitoes in different CO<sub>2</sub> exposure treatments (AIR-, +CO<sub>2</sub>, and post-CO<sub>2</sub>), across all color stimuli. Exposure to CO<sub>2</sub> significantly elevated the flight velocities of mosquitoes (Kruskal-Wallis test with multiple comparisons: df=2, Chi-sq. = 597.23, P < 0.001), although there was no significant difference between AIR and post-CO<sub>2</sub> treatments (Kruskal-Wallis test with multiple comparisons: P>0.05). Bars are the mean ± sem. (b) The flight velocities for each tested hue. There was no significant difference between hue treatment groups (Kruskal-Wallis test: df=11, Chi-sq. = 10.17, P = 0.42). Bars are the mean ± sem. (c) As in a, except for the mosquito flight durations. Exposure to CO<sub>2</sub> significantly the duration of the flight trajectories (Kruskal-Wallis test with multiple comparisons: df=2, Chi-sq. = 87.83, P < 0.001), although there was no significant difference between AIR and post-CO<sub>2</sub> treatments (Kruskal-Wallis test with multiple comparisons: P>0.05). (d) As in b, except for the flight durations of each color stimulus. There was no significant difference between hue treatment groups (Kruskal-Wallis test: df=11, Chi-sq. = 16.82, P = 0.16). (e) The number of mosquitoes visiting the visual

objects over the duration of the experiment. Few mosquitoes investigated the visual objects before or after the CO<sub>2</sub> exposure (Air and post-CO<sub>2</sub>, respectively), and there was no significant difference between those two time periods (Kruskal-Wallis test with multiple comparisons between AIR and post-CO<sub>2</sub>:  $P > 0.98$ ). However, exposure to CO<sub>2</sub> significantly increased the numbers of mosquitoes visiting the visual objects (Kruskal-Wallis test with multiple comparisons:  $df=11$ ,  $\text{Chi-sq.} = 258.72$ ,  $P < 0.001$ ;  $P < 0.001$ ). During CO<sub>2</sub>, there were no significant differences in the number of mosquitoes investigating the different hues (Kruskal-Wallis test with multiple comparisons:  $P > 0.99$ ). Lines are the means and shaded areas the  $\pm$ sem. **(f)** The lux measurements of stimuli used in the ERG experiments. Experiments used either a short-throw projector (left) or a digital monochromator (right).



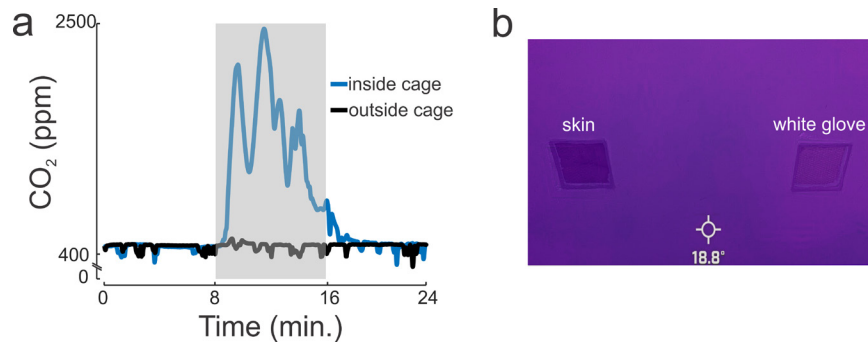

**Figure S2. CO<sub>2</sub> and temperature measurements in the cage assay. (a)** CO<sub>2</sub> measurements were taken outside (black trace) and inside (blue trace) the cage during experiments to measure if background contamination was occurring. CO<sub>2</sub> concentrations only increased in the cage during pre-programmed release from the mass flow controllers (grey shaded area). **(b)** Image taken from a FLIR camera (FLIR One Pro, FLIR Systems Inc., Goleta, CA USA) showed a constant temperature range, and did not show any variability including the region of the cage where the volunteer's skin was displayed through the window. The thermal shielding and IR absorptive windows in the cage prevented a radiant heat signature that is attractive mosquitoes.

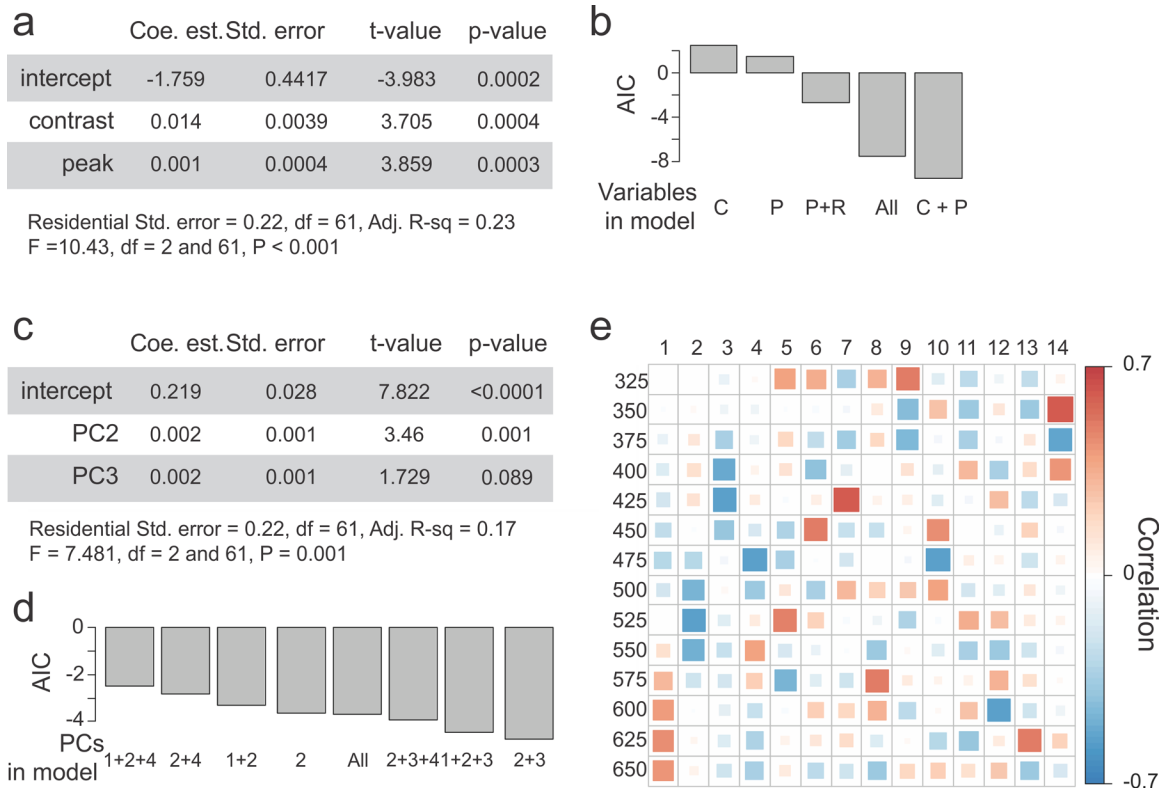

**Figure S3. Models on the contributions of contrast and hue wavelength on mosquito preferences.**

(a) Linear model results based on contrast and peak wavelength values. (b) AIC of all the models significantly different from a null model and based on combinations of the contrast (C), peak wavelength (P) and brightness (R) values. The model in (a) was selected as the best having the lowest AIC values. (c) Linear regression parameters, standard errors, t-values and P-values for the model based on the PC2 and PC3. The PCs were obtained from the area-under-the-curve (AUC) of the reflectance curves calculated every 25 nm from 325 to 675 nm. (d) AIC of all the models significantly different from a null model and based on combinations of the first 4 PCs (representing more than 99% of the variance of the original dataset). The model in (c) was selected as the best having the lowest AIC values. (e) Correlation matrix between the AUC values from 325 to 675 nm and the 14 resulting PCs. The first three PCs correlated with different parts of the spectrum: PC1 was strongly positively correlated with the 575-675 nm range whereas PC2 and PC2 strongly negatively correlated with the 475-575 nm and 375-475 nm range respectively.
